# Supplementary material for: Diversification of CpG-Island Promoters Revealed by Comparative Analysis Between Human and Rhesus Monkey Genomes
Source: PubMed Central journal article supplement (PMC7496026; doi:10.1007/s00335-020-09844-2), 2020-07-09

# HP02

CGCCTGCCCAAGGGTAAAGAGGTTAGACGGGATGAACTAGGGACCGGAAGA

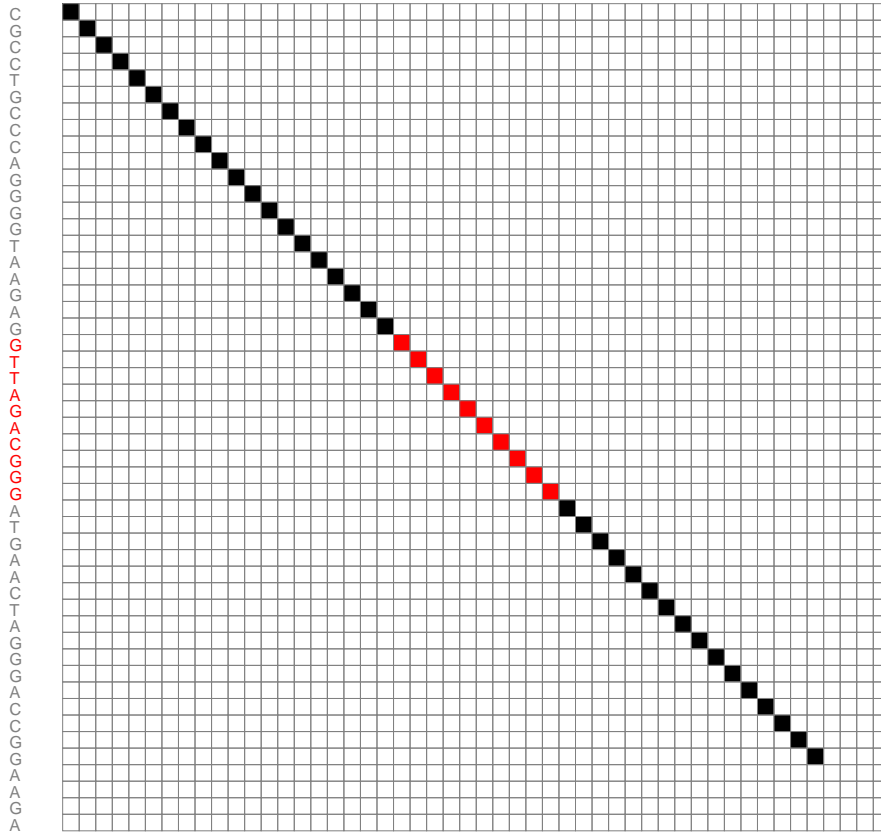

# HP03

CCCGGCTGAGCTGGGAGCTGGAGTGAGGGGCATCG

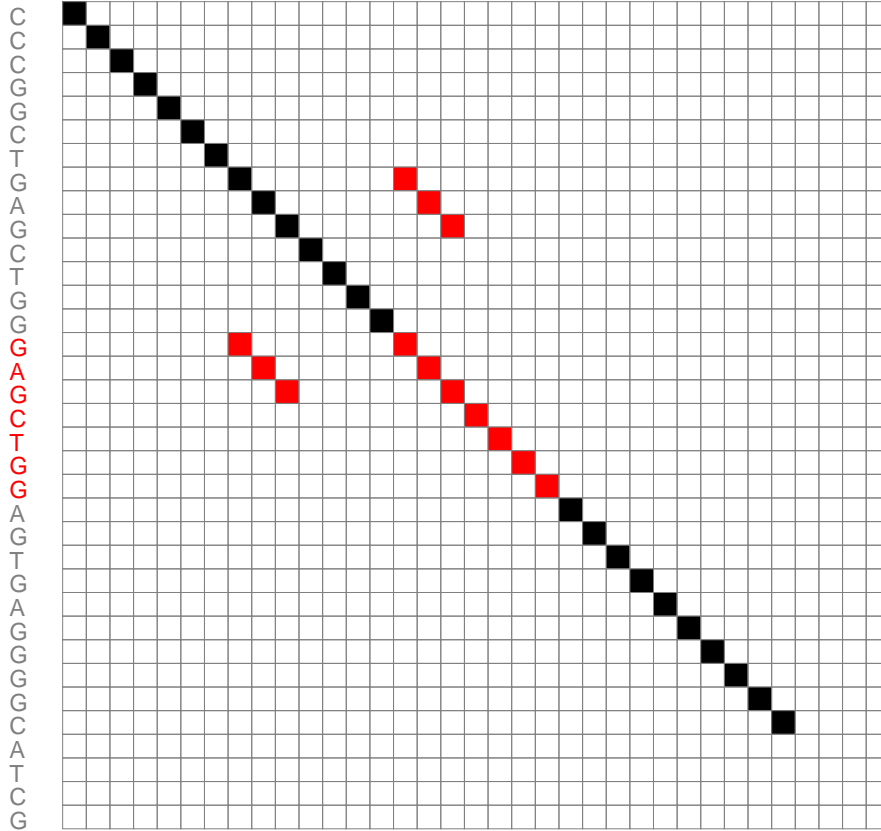

# HP04

T G G A G G G C G G G A G G G C G G G T G G A C A G G A G G G G C G G C T C C C

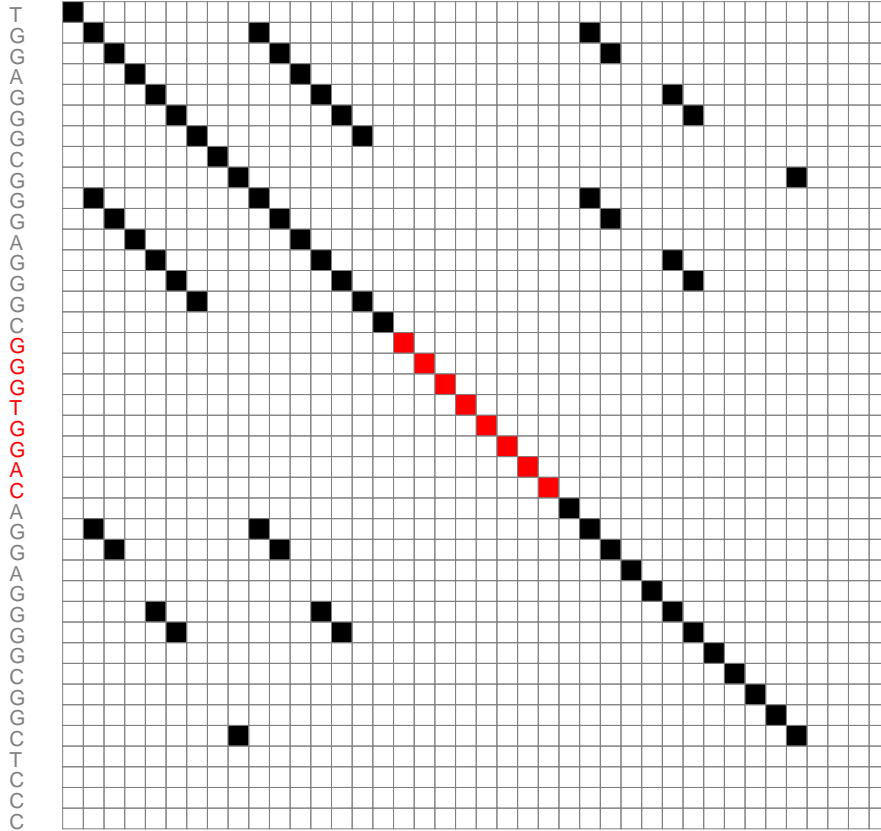

# HP05

ATTAGTCCCTTTGATAC**CTTCTTT**ATTCATTTATTTGAGAG

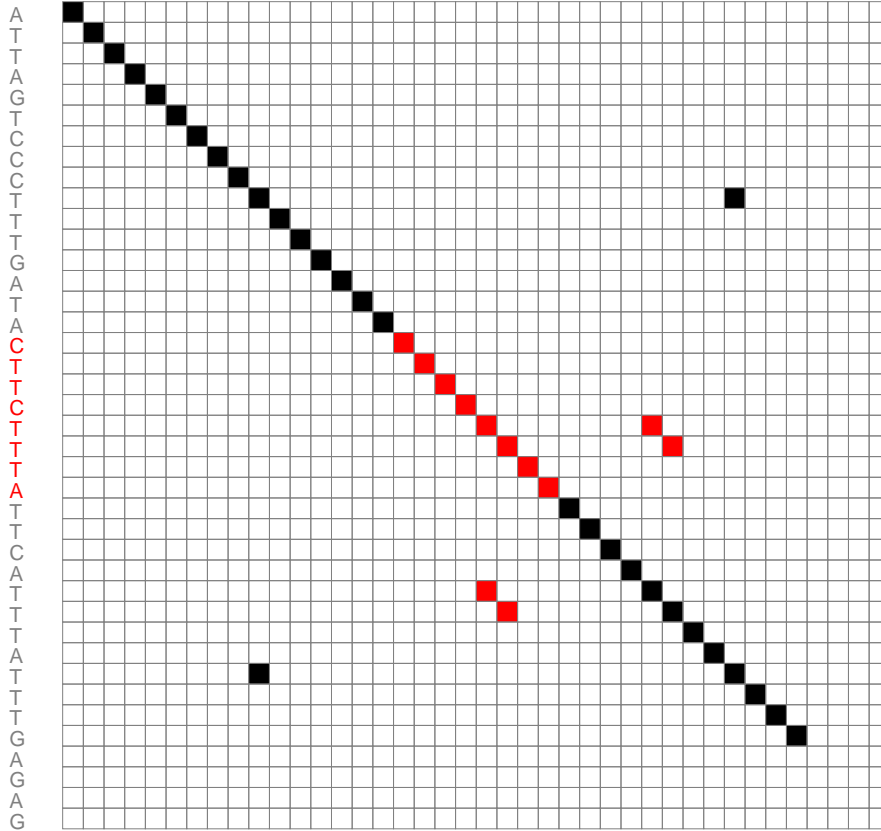

# HP06

TCTCTAAGCTACAGTCCCAGCTCCAGTCCCAAGTCCAGTCCCAGGGCGCCTGCGCACTT

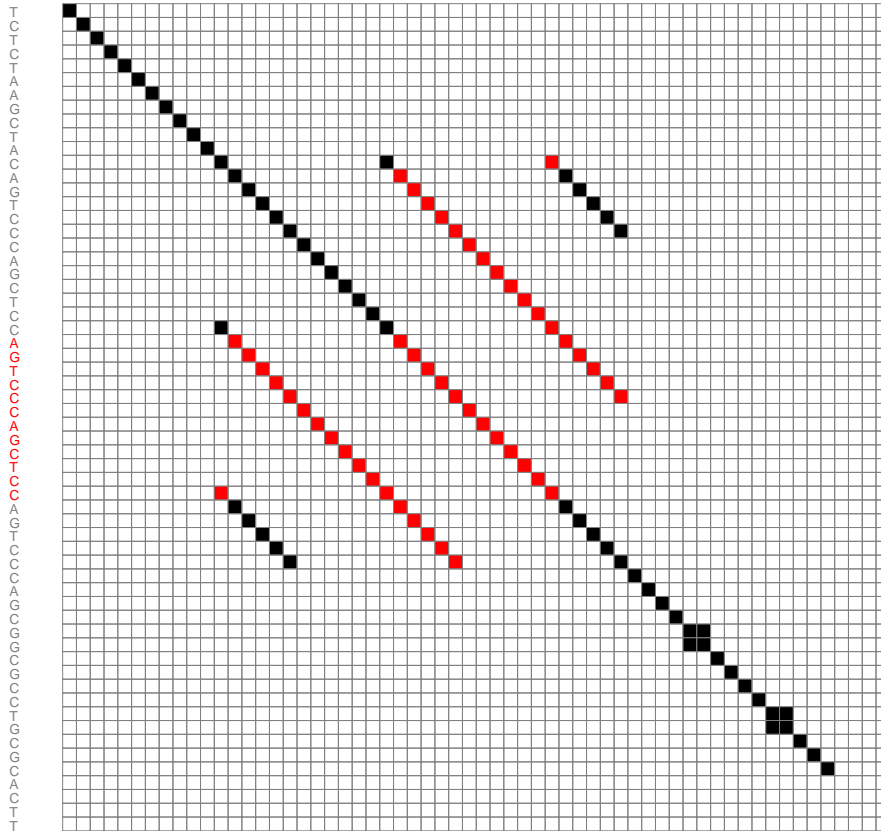

HP07

GGATCGCGGT CGCGGTGAGAGCCG

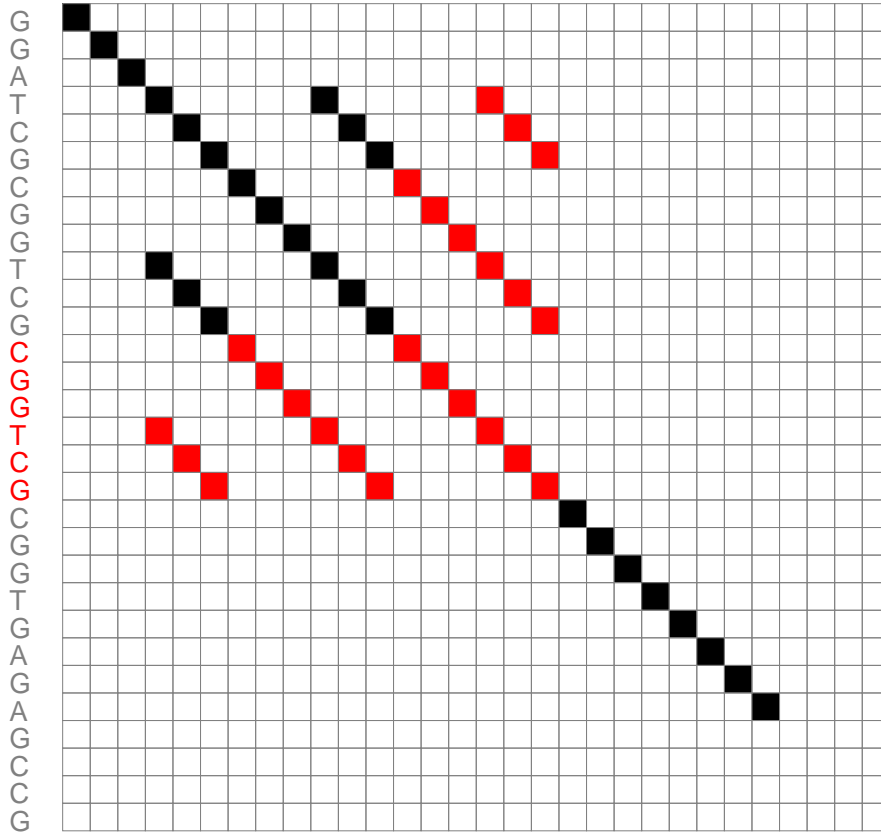







# HP10

AGACTCCCAGGCTGGAATGGTGTCTCATATCGAGGAGAGGATACTGAGGCCAGAAATGTGCCCTAGCTTTAC

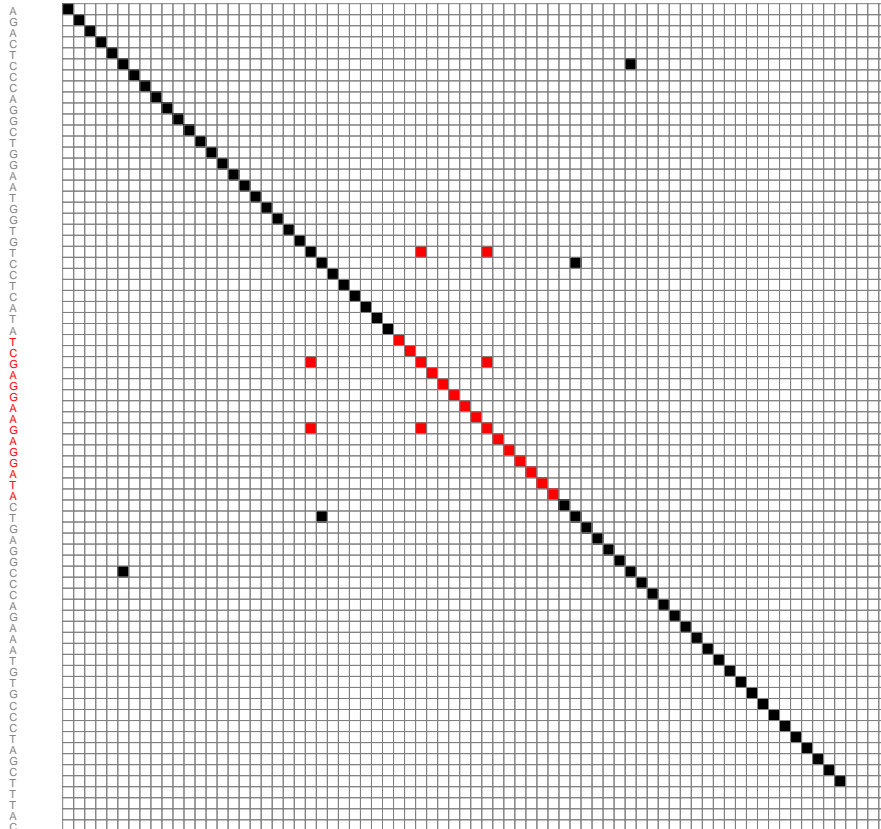

# HP11

TCTAATATTGTAATACAAATAACATAAATAACATTAAGCTATGGT

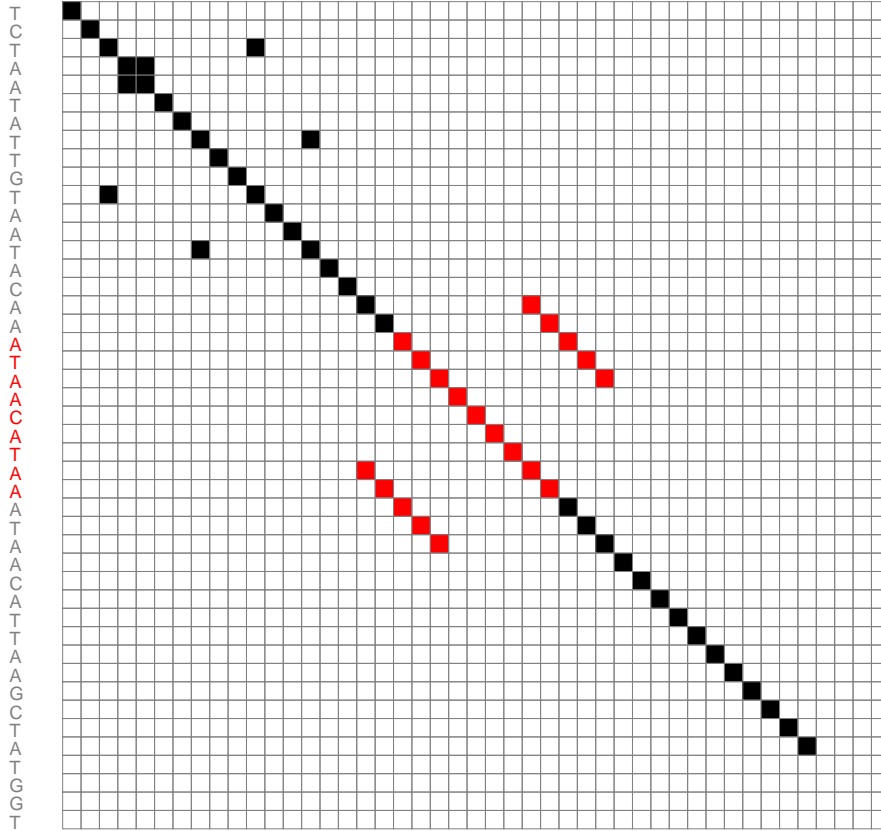





# HP14

GTAAAAACATGGGCAGCAGGAAGTGCAGCAGGAAGTTCAGCAGGGGCTGCAGGCTCCAGT

GT  
T  
A  
A  
A  
A  
A  
C  
A  
T  
T  
G  
G  
C  
A  
G  
C  
A  
G  
G  
A  
A  
G  
T  
G  
C  
A  
G  
C  
A  
G  
G  
A  
A  
G  
T  
T  
C  
A  
G  
C  
A  
G  
G  
G  
C  
T  
G  
C  
A  
G  
G  
C  
T  
C  
C  
A  
G  
T

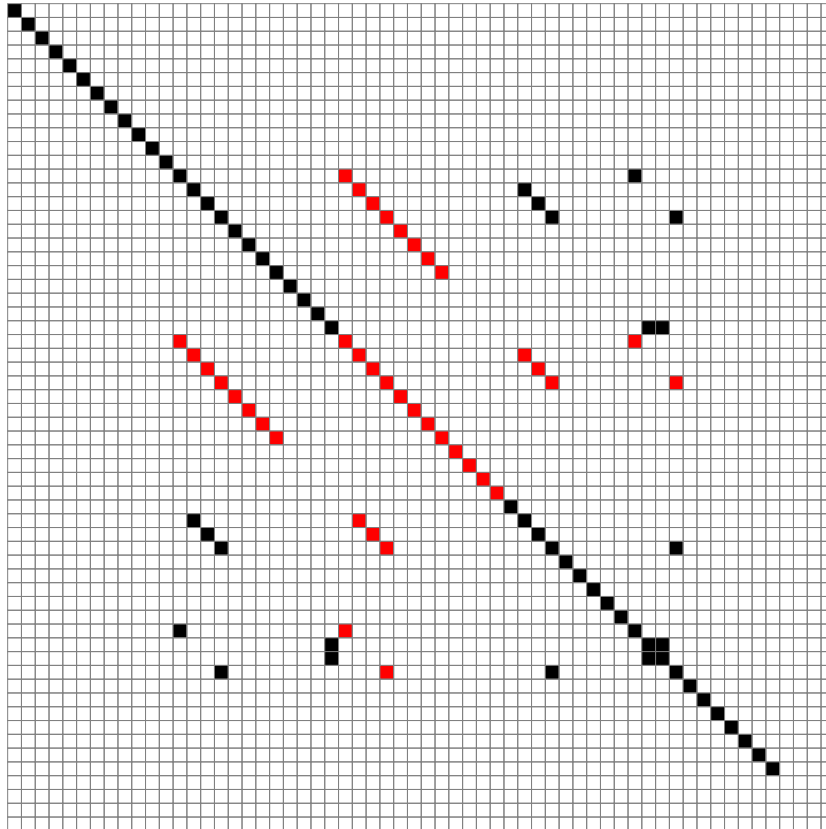









# HP18

- - - CCCAGAAAGGTGGCCGTAGAATGGCTTTGGGAGTTCAGCGTC

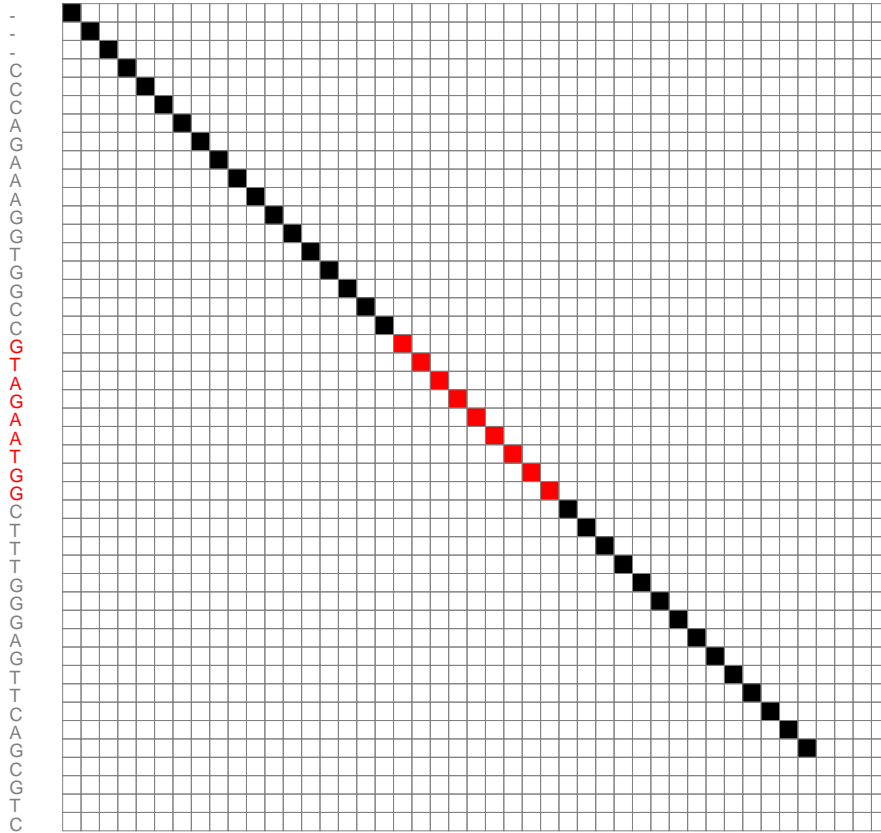

# HP19

AGG<sup>B</sup>GTGGGA<sup>B</sup>GCAC<sup>T</sup>CGGT<sup>C</sup>TCTCCCCACAC<sup>C</sup>TCTCG<sup>C</sup>CTGAGGCCA<sup>G</sup>GGGCCA<sup>G</sup>TGT<sup>C</sup>CG<sup>C</sup>CTGAAGCCAG<sup>A</sup>CABC<sup>C</sup>GGTTTGGGAGCGAG<sup>C</sup>CTGAGGTAGCCACCCCGAGGGGAAG<sup>T</sup>G

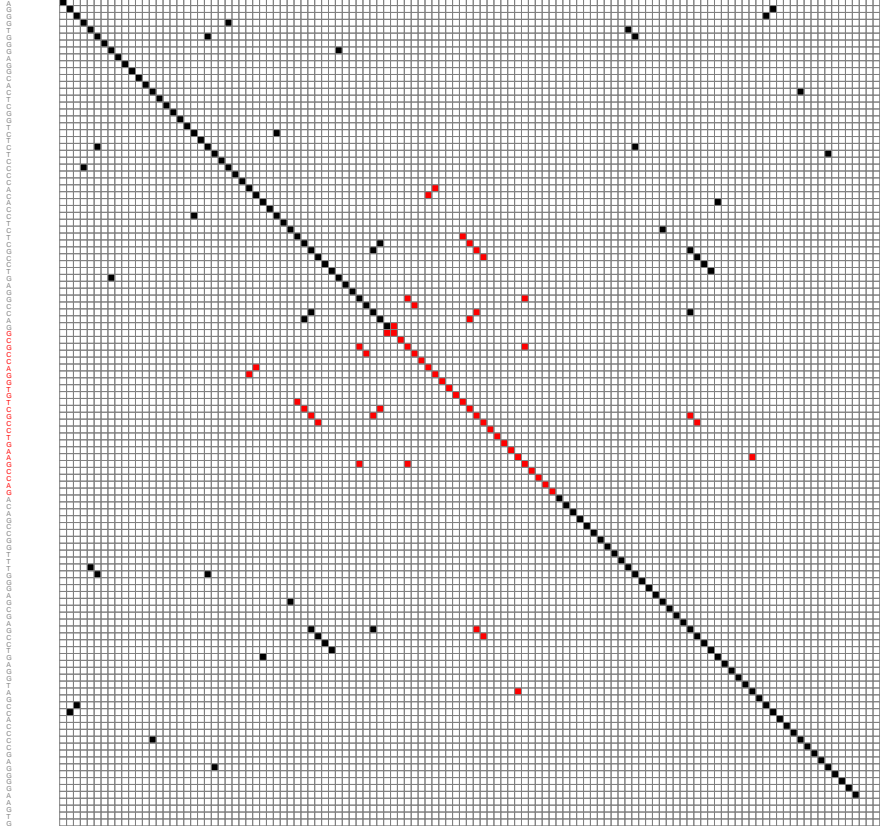

# HP20

AGG<sup>B</sup>GTGGGA<sup>B</sup>GCAC<sup>T</sup>CGGT<sup>C</sup>TCTCCCCACAC<sup>C</sup>TCTCG<sup>C</sup>CTGAGGCCA<sup>G</sup>GGGCCA<sup>G</sup>TGT<sup>T</sup>CG<sup>C</sup>CTGAA<sup>G</sup>CCCA<sup>G</sup>AC<sup>B</sup>CCGG<sup>T</sup>TTGGGAGCGAG<sup>C</sup>CTGAGGTAGCCAC<sup>C</sup>CCGAGGGGAAG<sup>T</sup>G

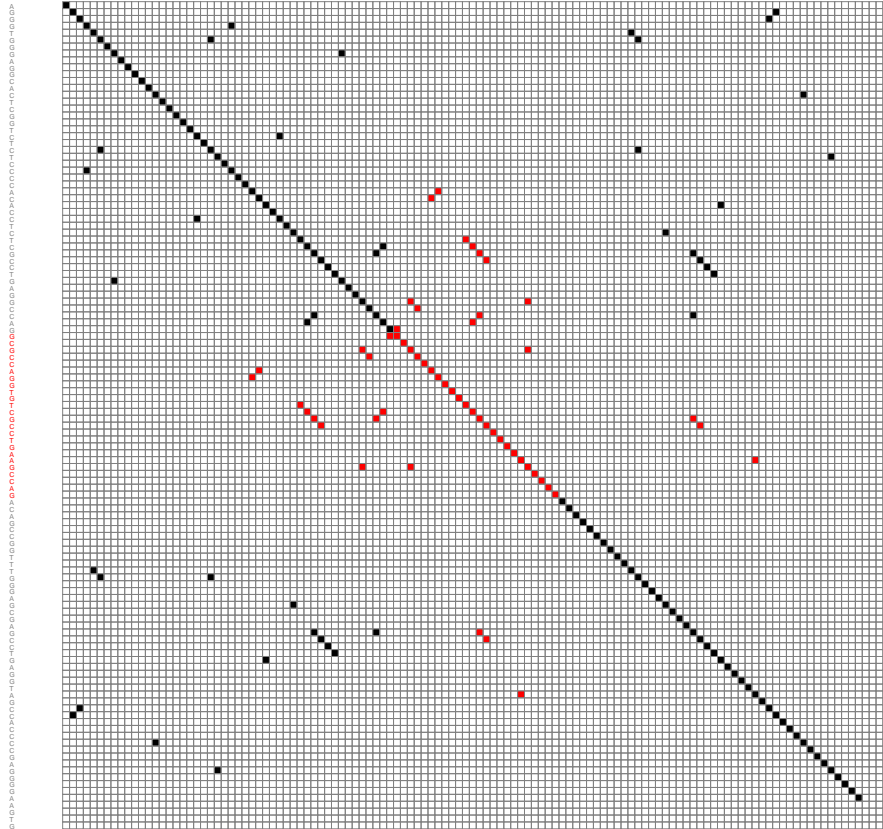

# HP21

CCAAA GCCCTGTGGCGAGGCCAGGAGCTTACTGTCCCAAGCTGCTCCCTGACTCCGGAGATTACCGCCCG

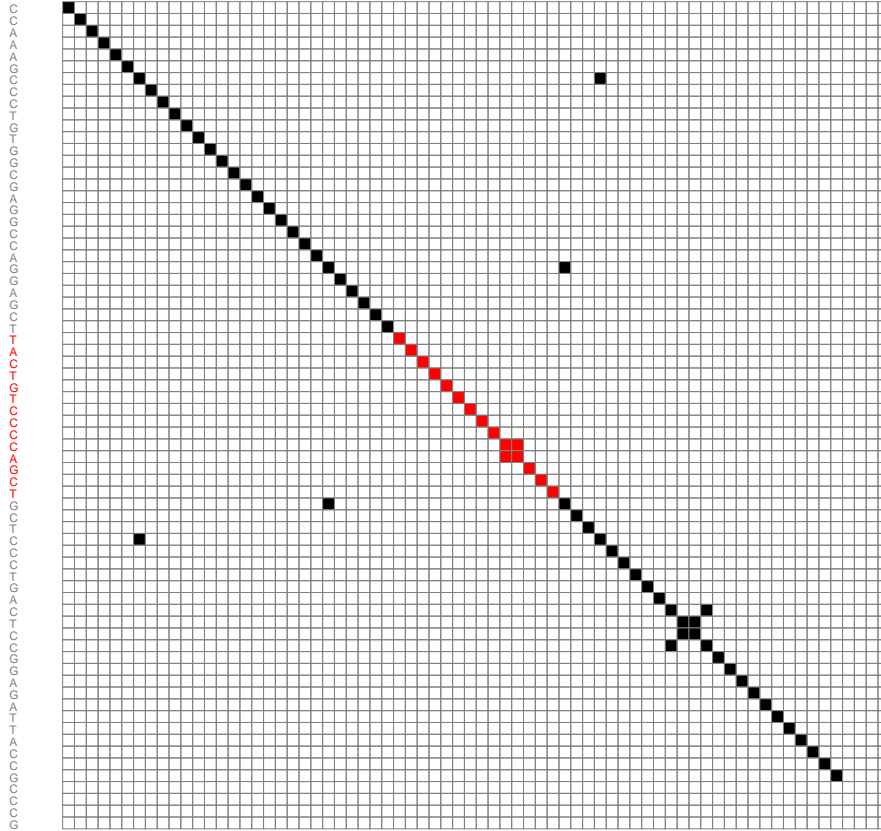

# HP22

TTCATTTACATAAT AATTTTTTTTTTTTTTTTAAA

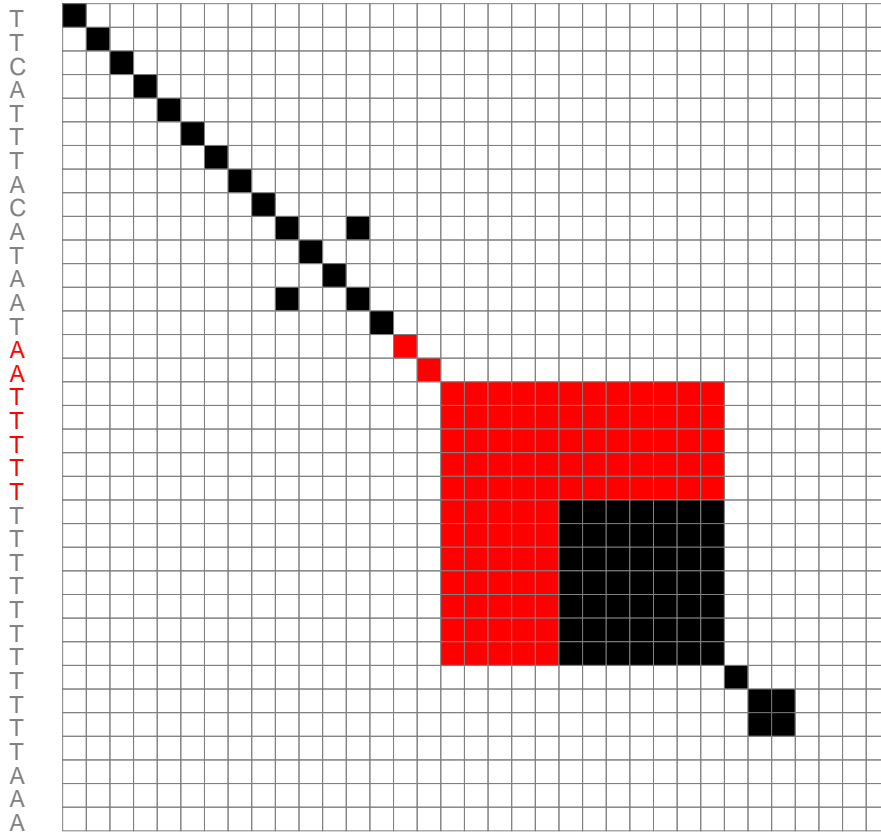



# HP24

CT - GGGGAGTTTCTGGCGCTGCCGGCGTTCCCACTCCCCAGGC

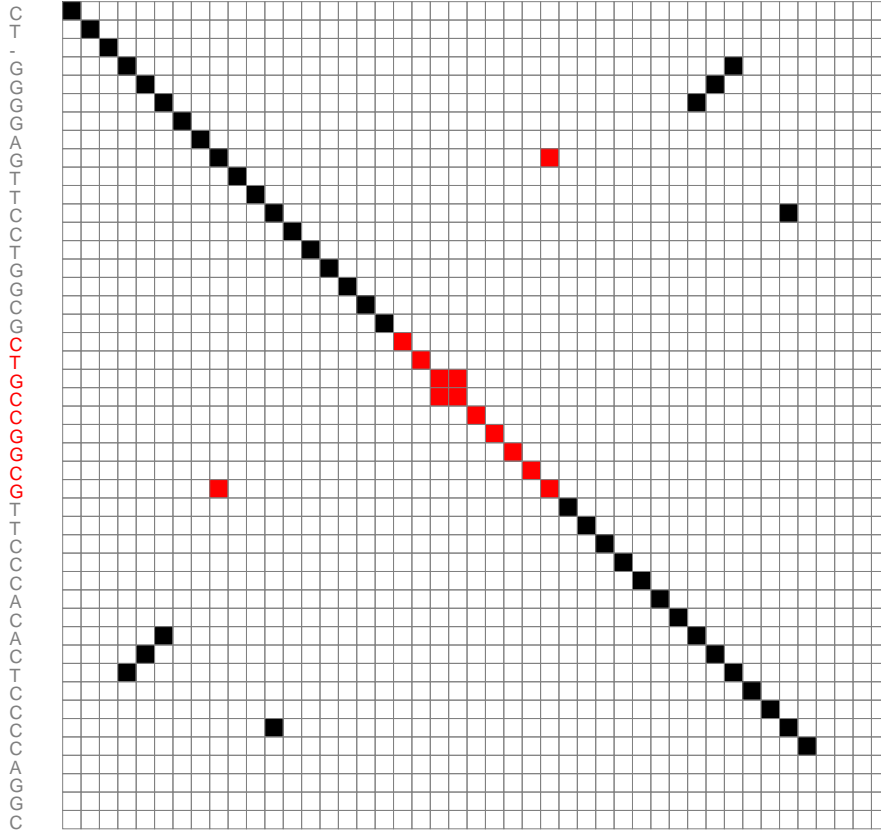



# HP25

GTTGATACTCAGTAAAAAATTTAAATAAAAGAACATTTCCAGCCGAGAAACAATTGCTTTTAGATCCCAGGTTTGACCCCTTATC

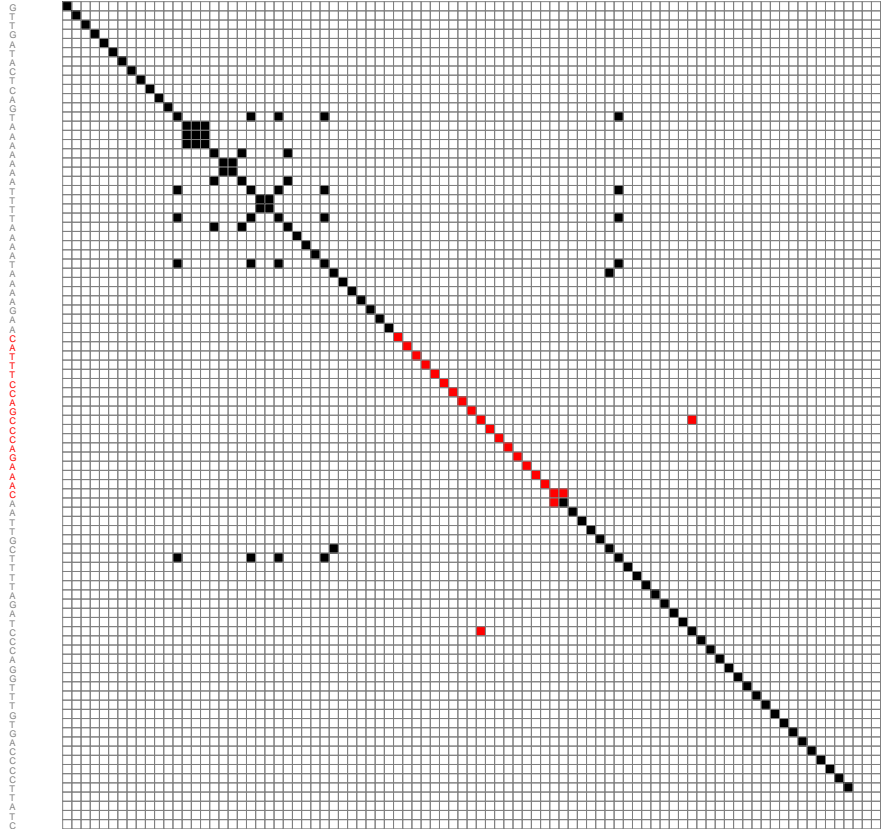

HP26

A C A G G A A A G A A A A G A A A G T T C C C T A

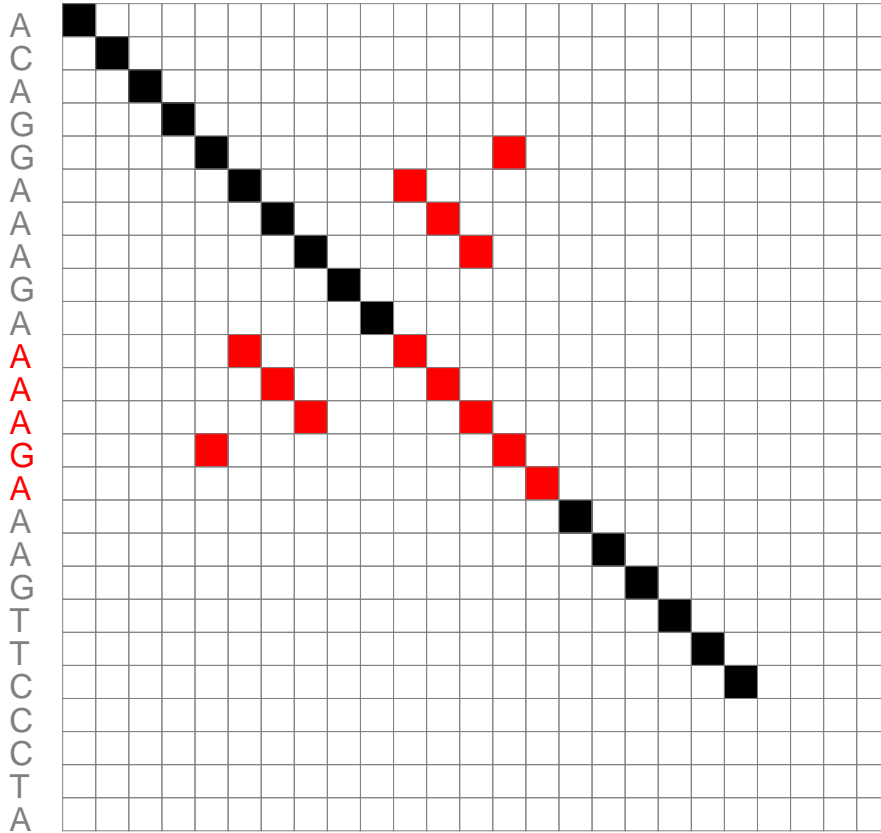

HP27

GGGCCGGGCCGGGCCGGGCCGGTGG

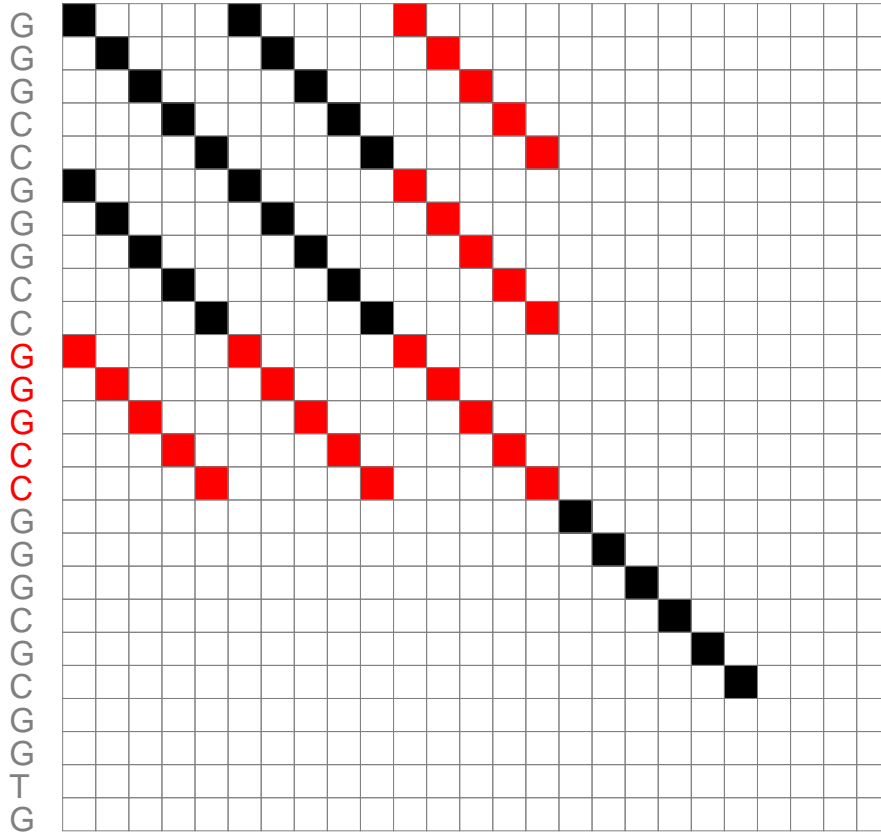

# HP28

AGTAAACATCGCGGCAGGTCCCGGGGCAGCCAGGCCAATGATAACCTTATA

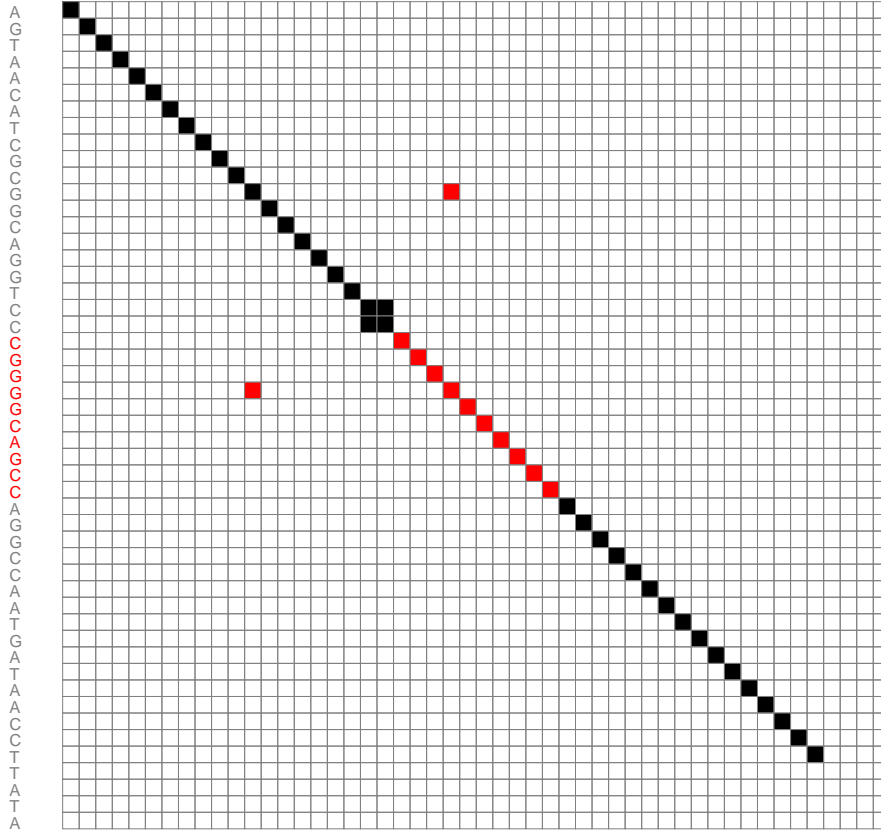

# HP29

ATAAAATAAACATCCACTTTAAAAATGAGAAAACAAAAACA AAAACAGA AACAAAAAAAAAACCCCAACAATCTTAGCTCA

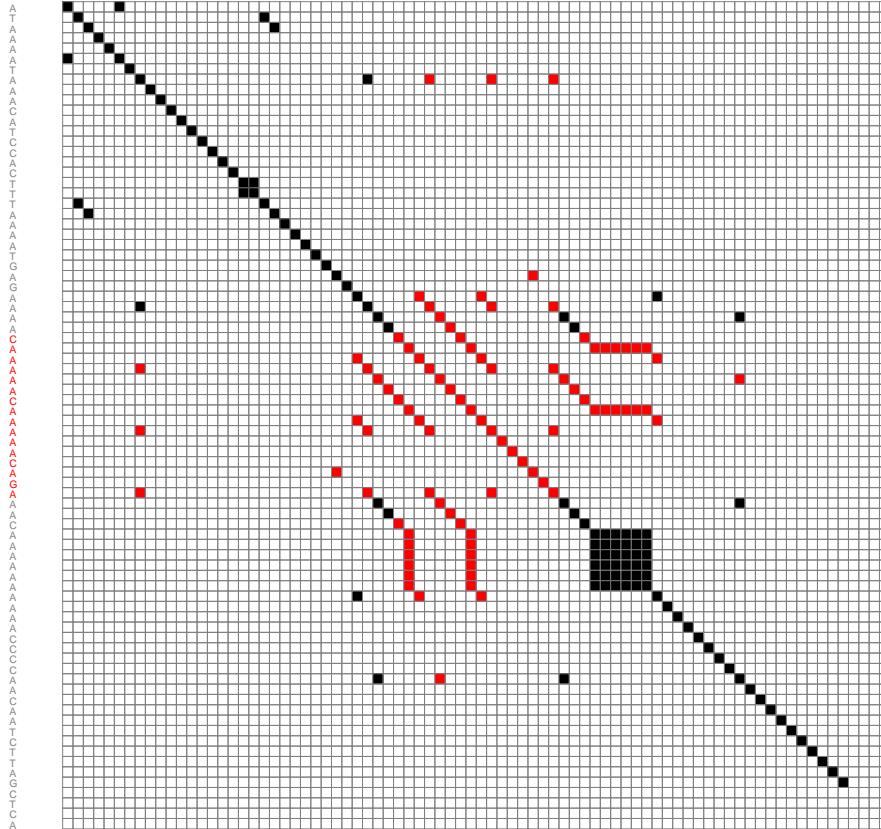

# HP30

GTGAGCAGTGAAAACCGAAGCGGCAGAGGGCAGTGGCAGCAGGCCAGTGGCCC

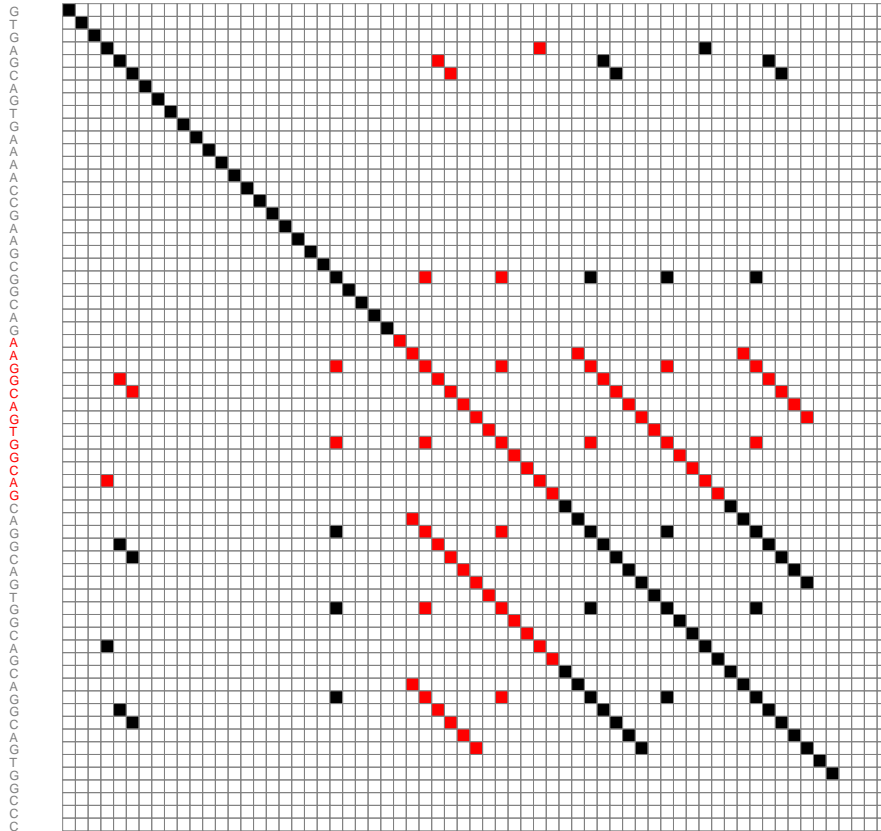

# HP31

CGTTTGCCCAAGGTGCGTGCGGCGGGTGGGGCGAGGTGCCAAAGGT

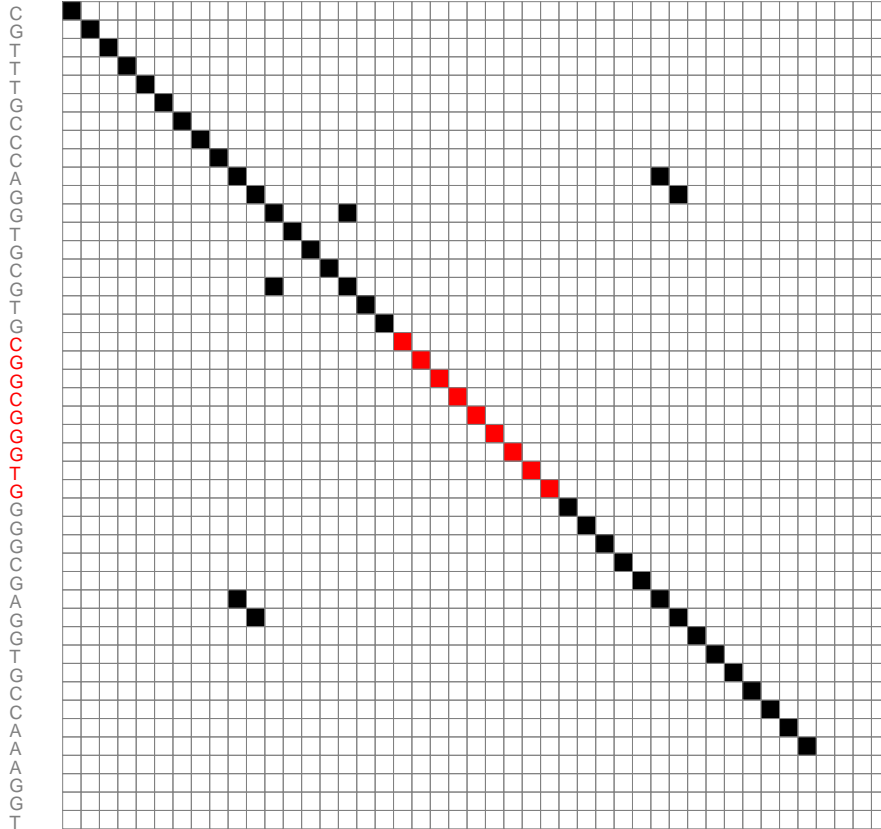

# HP32

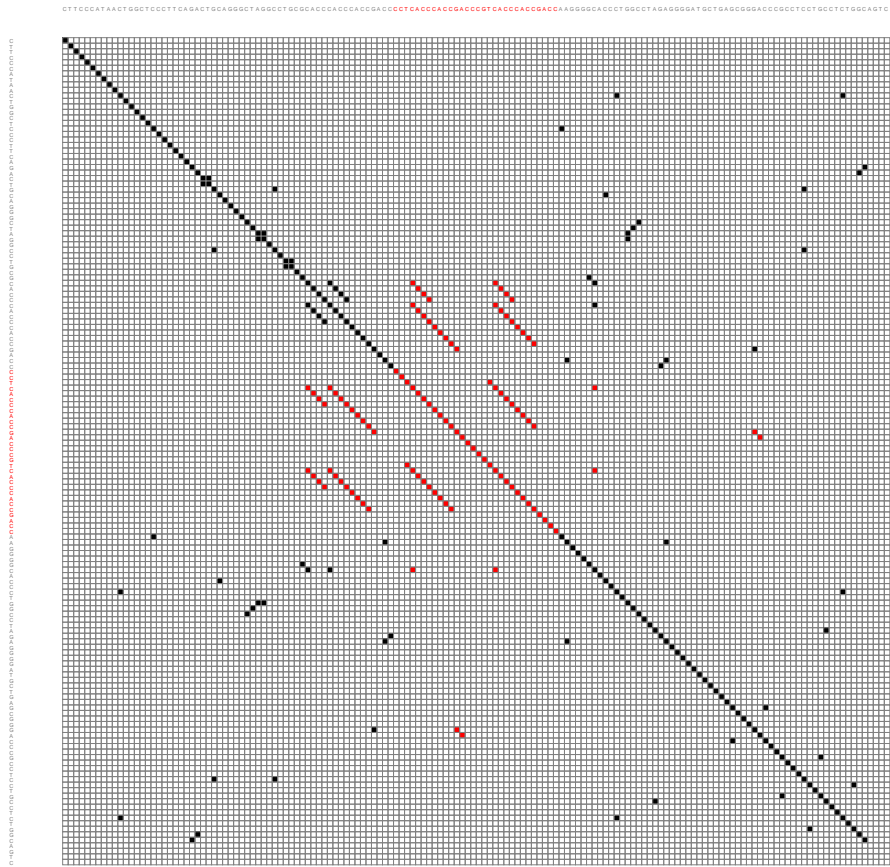





# HP34

TGCTCACTGAGGC**GGTGG**AGCTTGGAGCCG

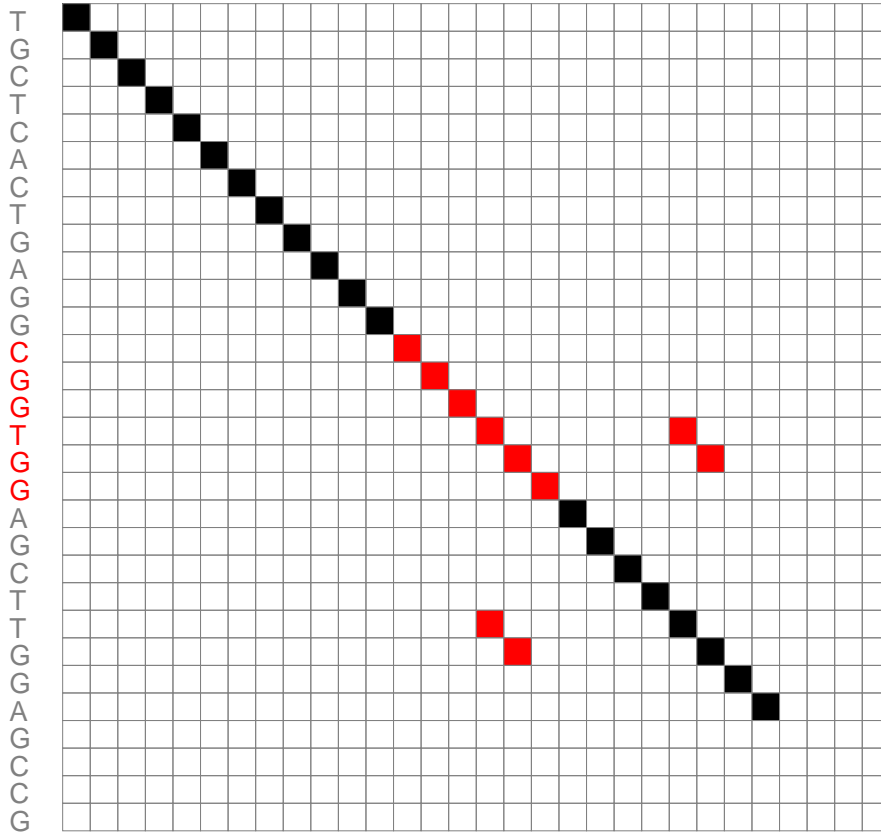

# HP35

GGCGGTGGAGCTTGGAGCCGGCCGGCTCAGAGCGCGGGGCTTTG

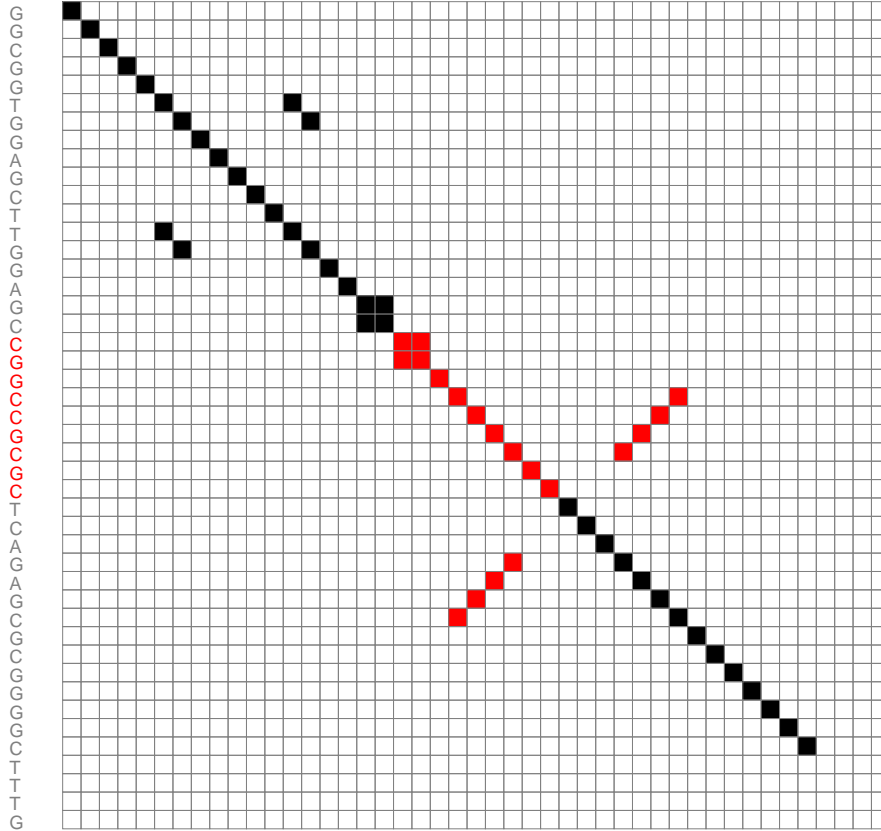







# HP39

GGACGGGGCTCTGTACACTCAAACGGAGGAGGGGAAGGGCGGGTGGGGGGGGGGTGGCGAGCCGGAAACCTTTGGCCAATCAGAGGGGCTGGG

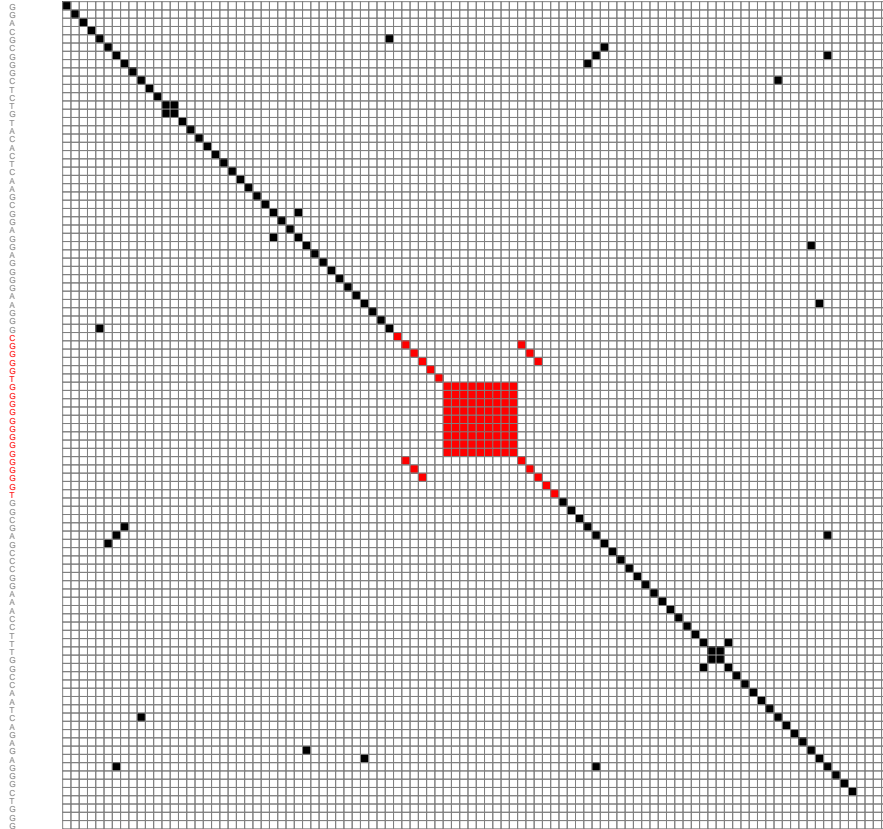

# HP40

ATGTATACGGTATATTGTGTTTAAAATATATATTCAGTGAATATATACTTCCTTCAAGTGTTTCAAATTC AAGGCTGA

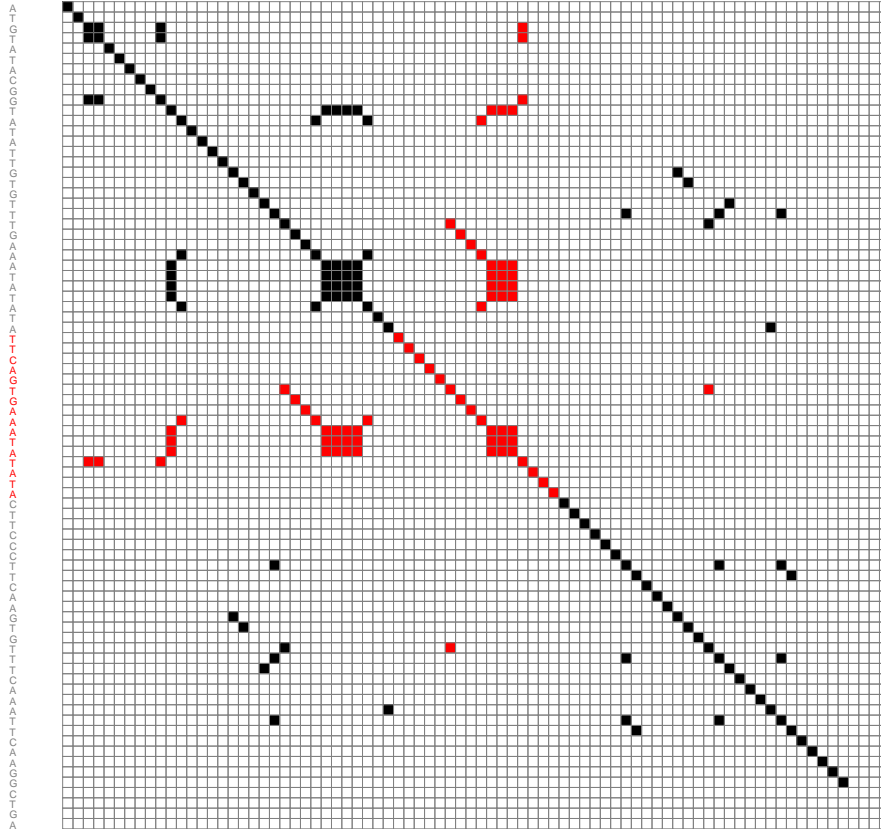



# HP41

ATTTTATGCCTTAA**TTCAA**AGAAACGAAGAAAC

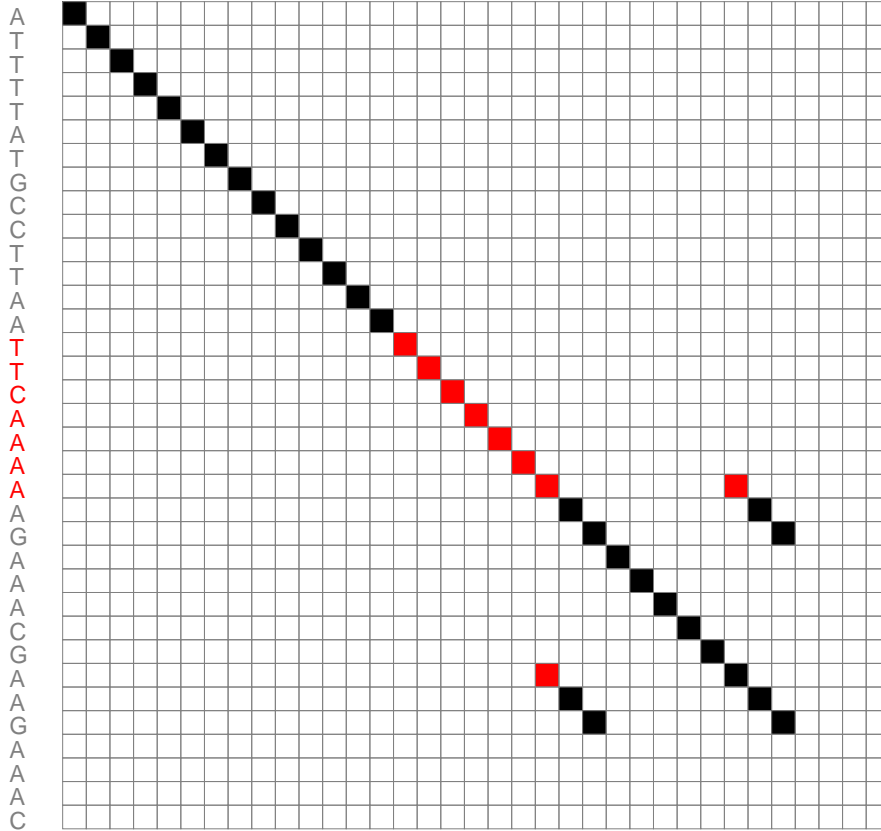



# HP43

TTCGCTCTGCTGGGGGCAAGGCTCGGCTGAAAAAG

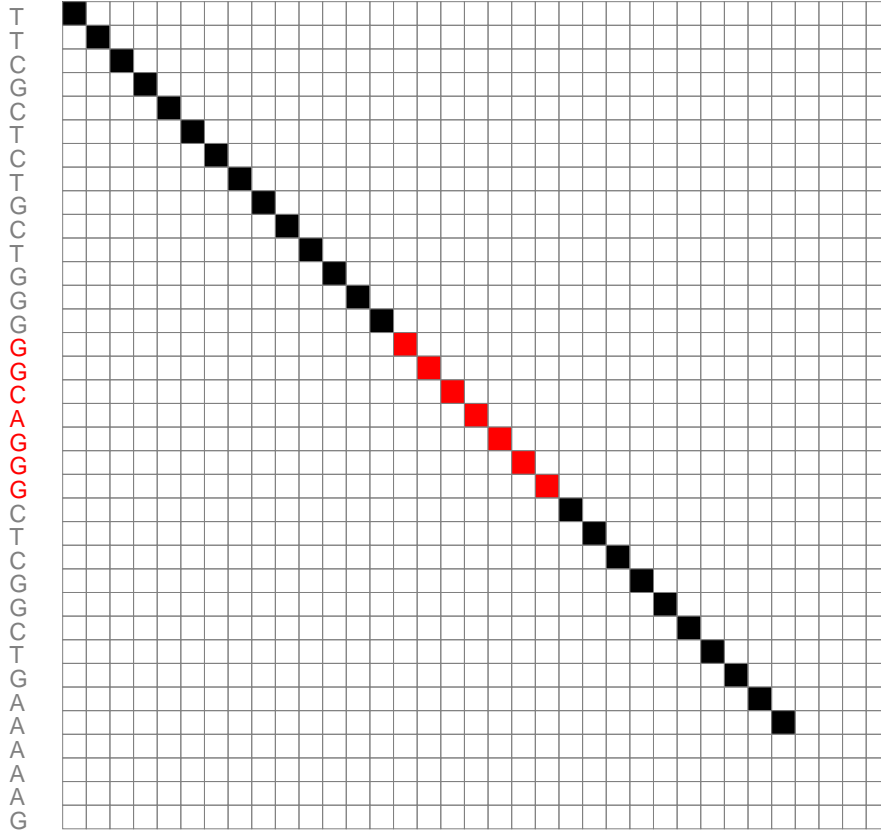





# HP46

T C G G A G G C C G A G G C C G A G A G C G A C G A G A G T

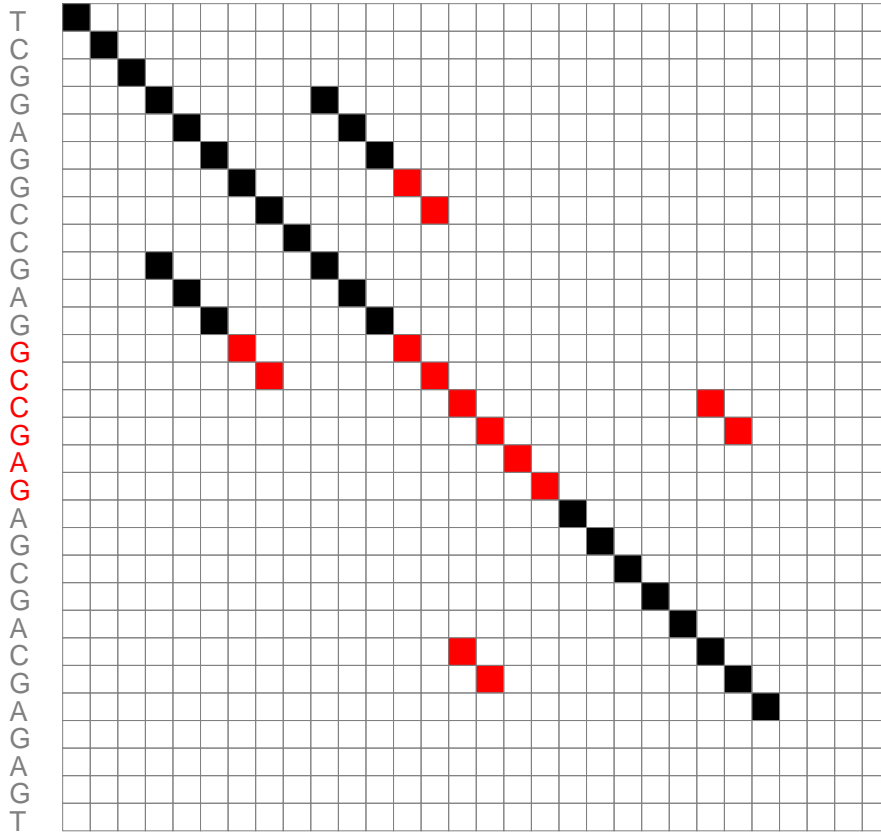

HP47

A A C T T A G C G G G T T G G T T T T T T T T T T

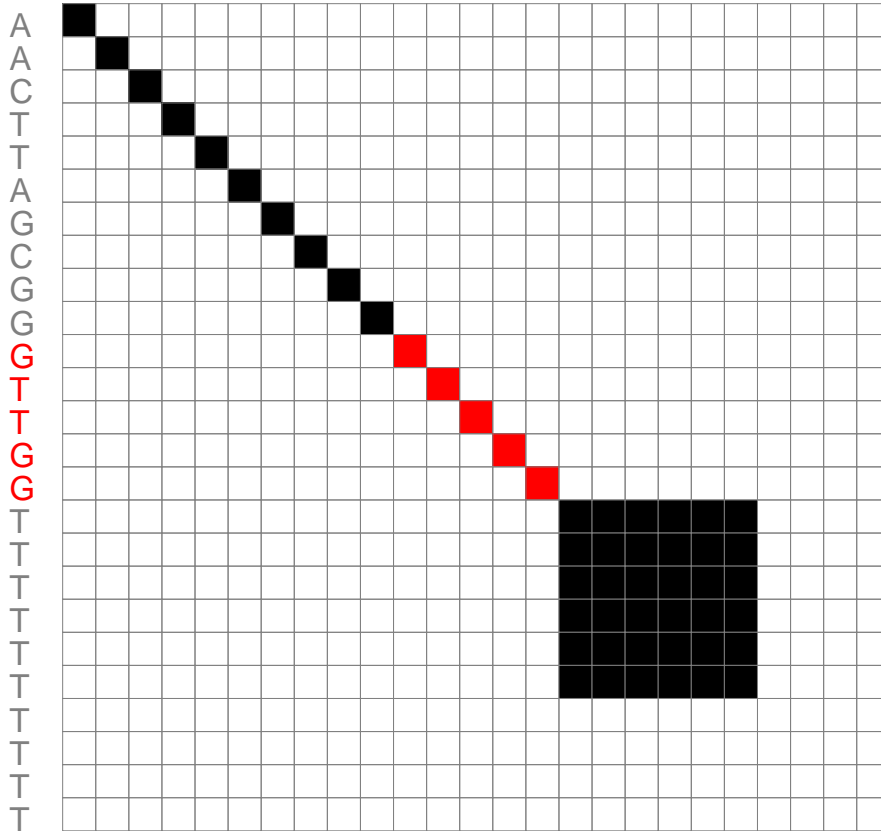

# HP48

GGCGGC GGCGGC **GGCGGC** TGCAGGACGAGC

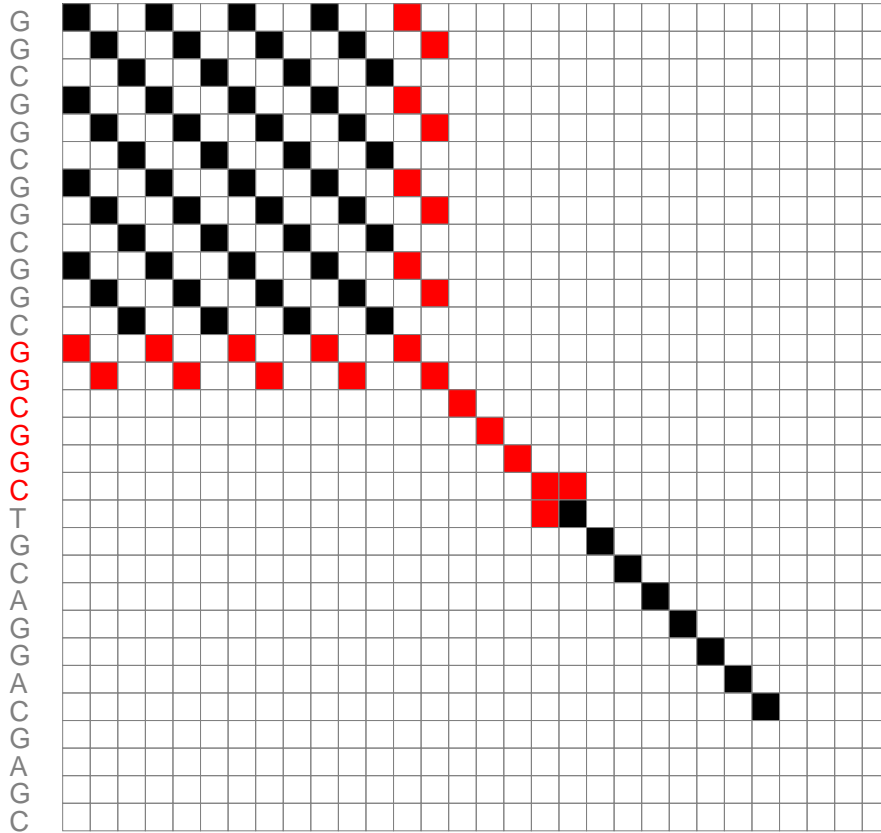







# HP51

AATTAAAAAAAAAGAAAAAAGGAAAAAAGAAAAATAAGTTCCTG

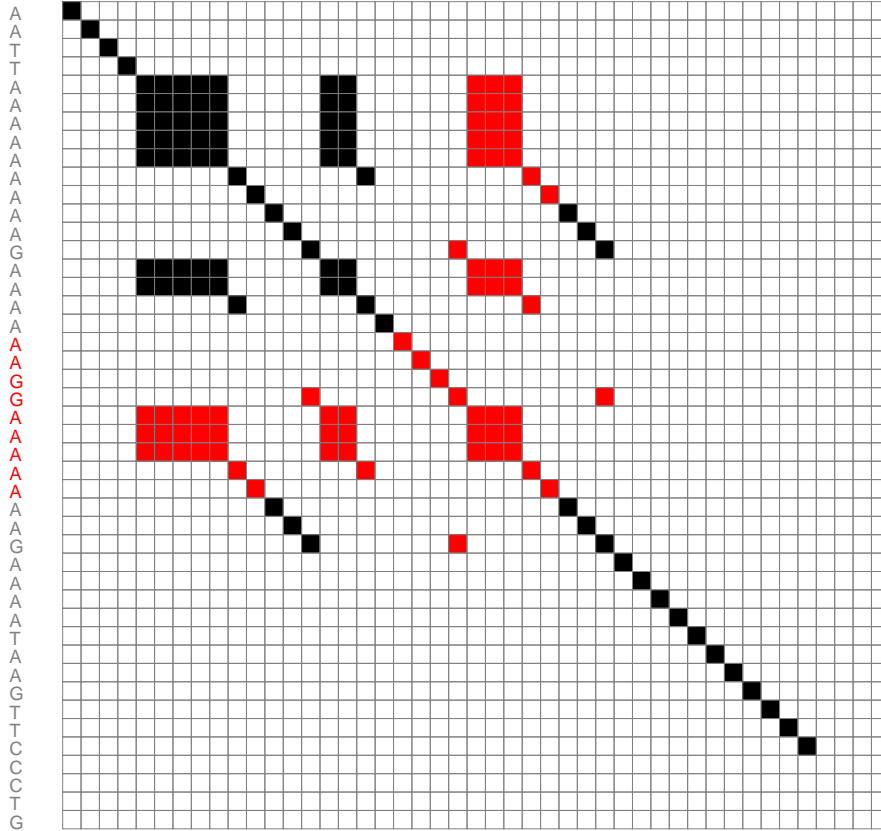



# HP53

GAAGCATT TTTGCTGTGTGGGTAAACCCTCCAGGAAGT T TGGT T T T C T C A C A G A G T G T A G C G T G C T G C A G A T T T G C A T A A A T C C C A G T G G A T

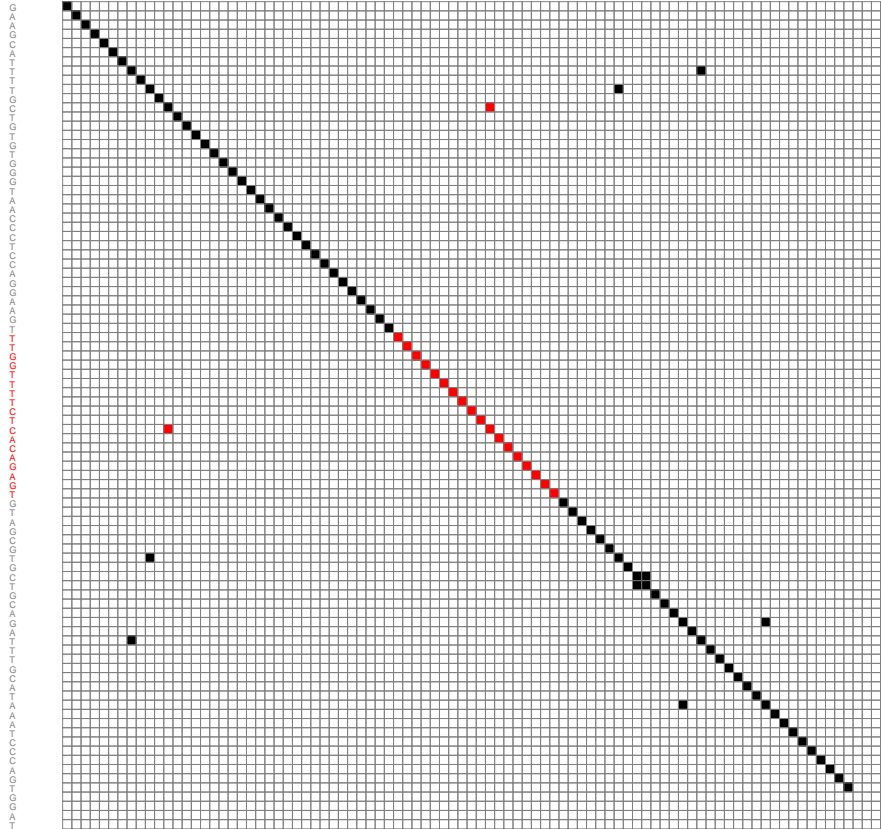

# HP54

CGCGAGGCGGAGGCCGGGGAAGGAGCGGGGAAGAAGCCTCCCCTCCCGGGGCGGATCCAG

C  
C  
G  
G  
A  
G  
G  
C  
G  
G  
A  
G  
G  
C  
G  
G  
G  
A  
A  
G  
G  
A  
G  
C  
G  
G  
G  
G  
A  
A  
A  
G  
A  
G  
C  
C  
T  
C  
C  
C  
C  
T  
C  
C  
C  
G  
G  
G  
G  
C  
G  
G  
A  
T  
C  
C  
A  
G

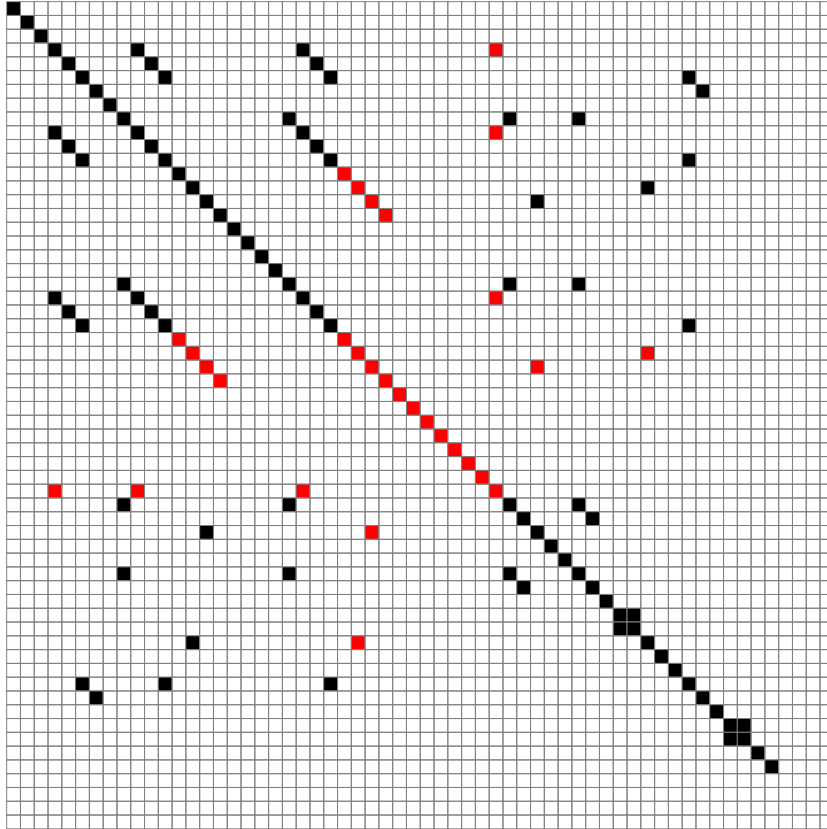

# HP55

TATCACTGACTCCGGGGC- GAAGAAGGT**C**GGGGT**G**GGGGTGGGGGTGGGGGTGGGGAGGGTGGGG

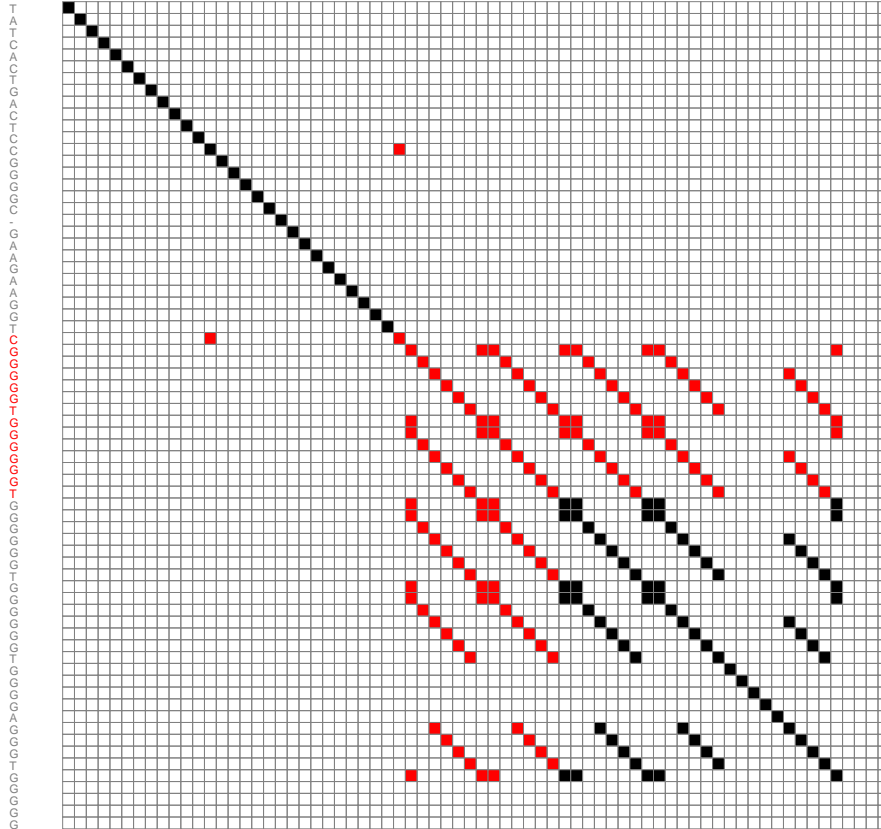

HP56

T A G A C T C C T C T T C T C C C T G C A G T G C

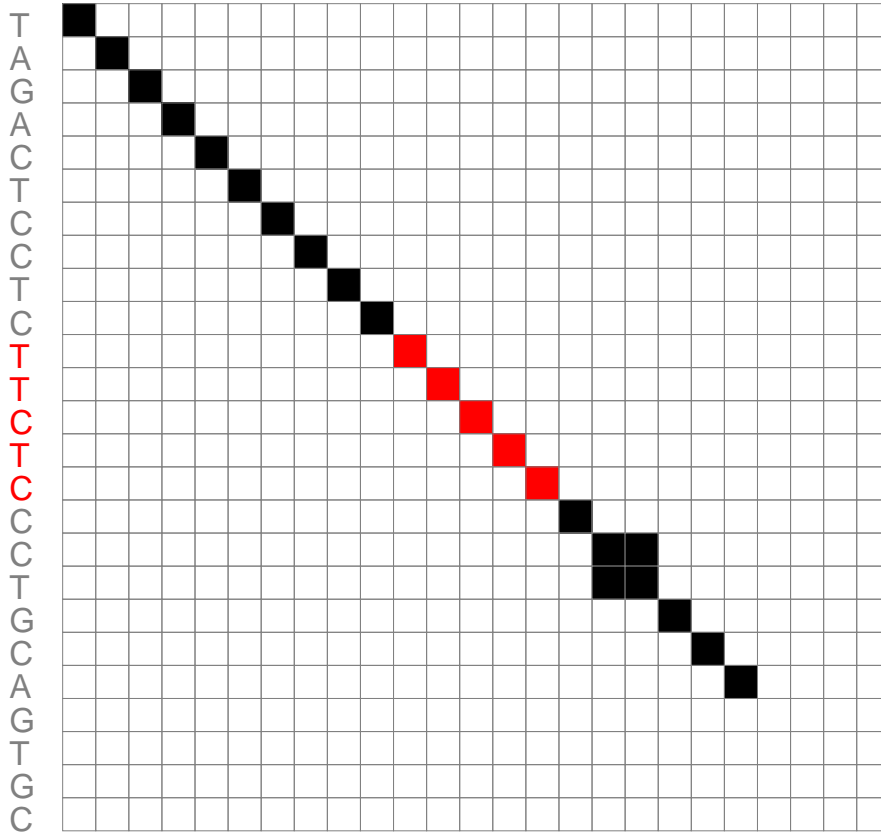



# HP57

AAAA GAGGAGGGAGGAGAGAGGAGGGAGAGGATACTGAGGAGGGAGAGTGGGAAGGGGAAGGGAGAGG

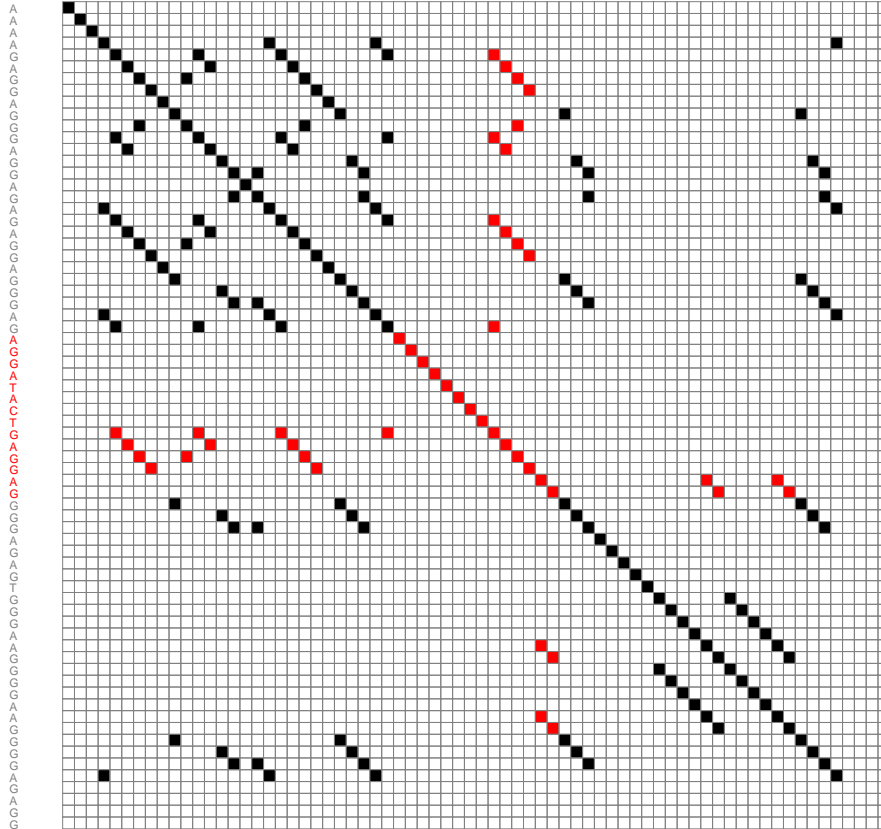

# HP58

AGTCTACTTCAGAAGCGGAGGCACTGGGAGTCCGGTTTGGGATTGCCAGG

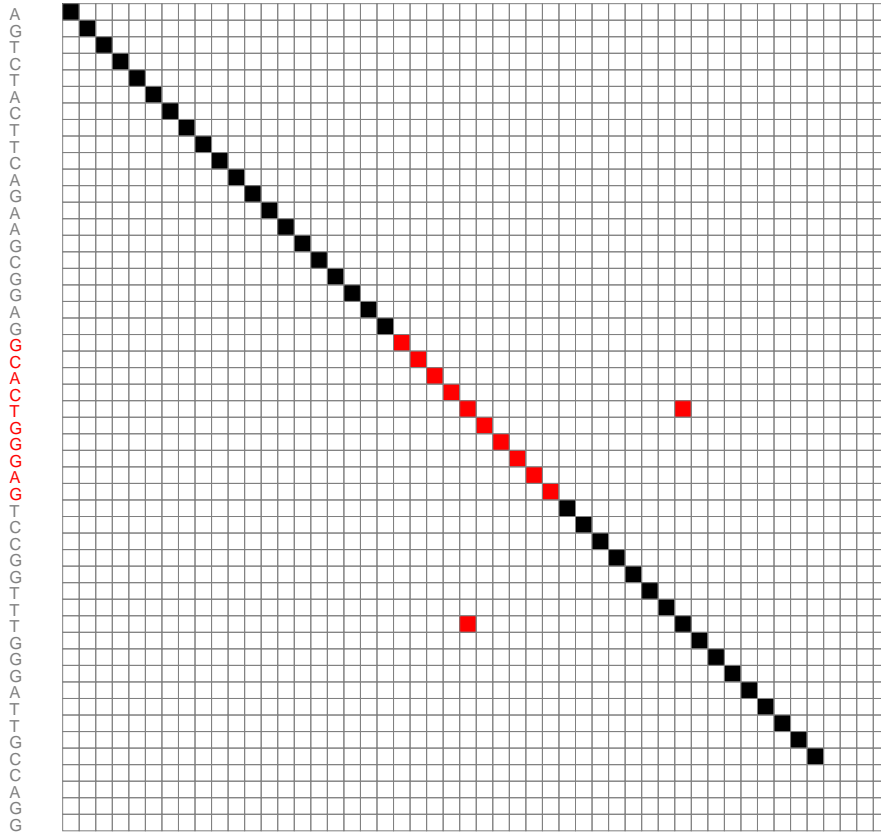





# HP61

GTAGGGTCGCCTCTCTCTGCAGCGCGTCTGGACCCCAAAGGAAGGATAGGGGGCAAGGGATCGGCCCTTT

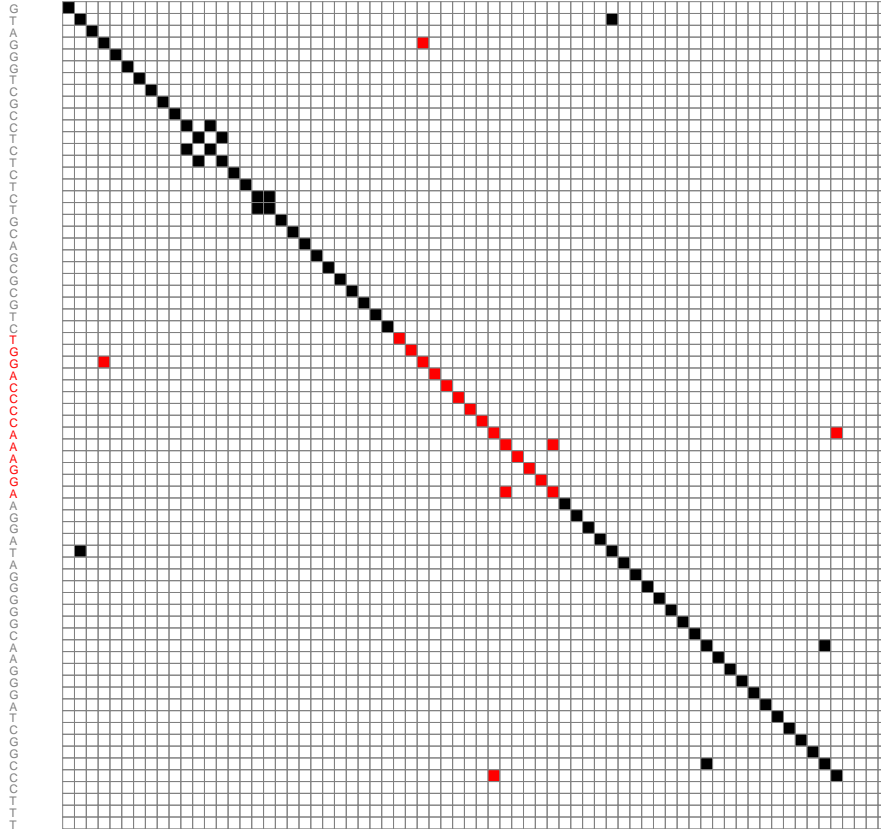

# HP62

GCAGGCGCGTTCGCTGGCTTTCTCTGGCTTCTCTGGGCGGCTGGGGGCT

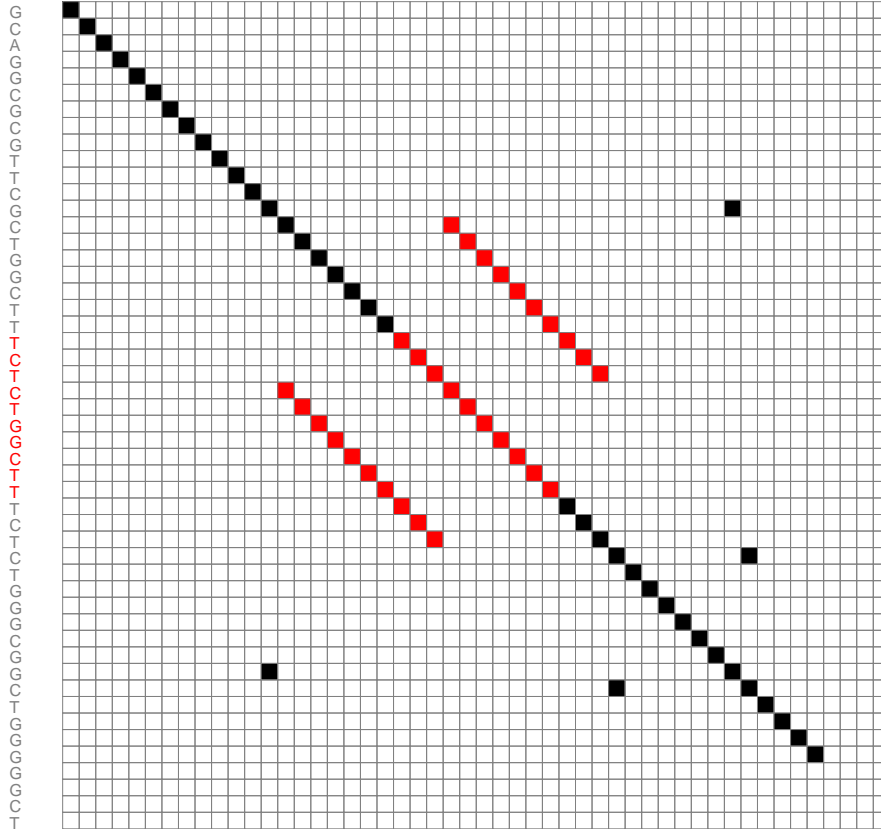

# HP63

GCCACCCTCGGTCA GAGGGCGGCCGTGTCCAGCGAGCAAACGGGCG

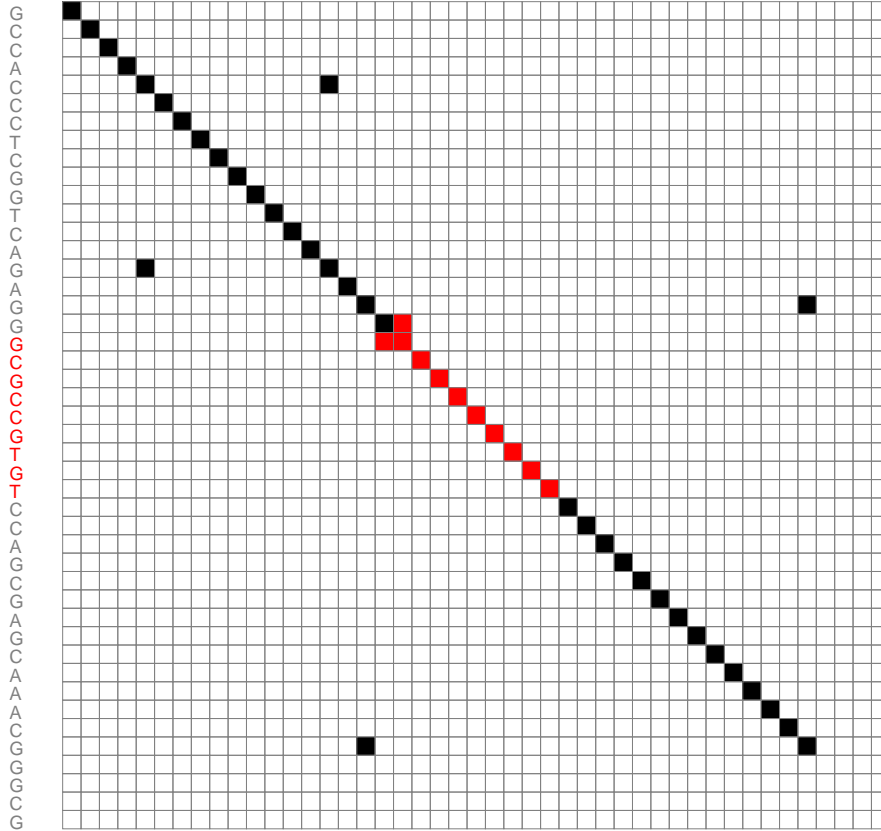





# HP65

GCAT AAAATGGGTAATGCCGGGAGGGTGGTCTGGAGGGACCTGGTGGTCCCAGCCTTTATCCAATCAGTGGCGTGGCGTGGGAACCAACCAAT

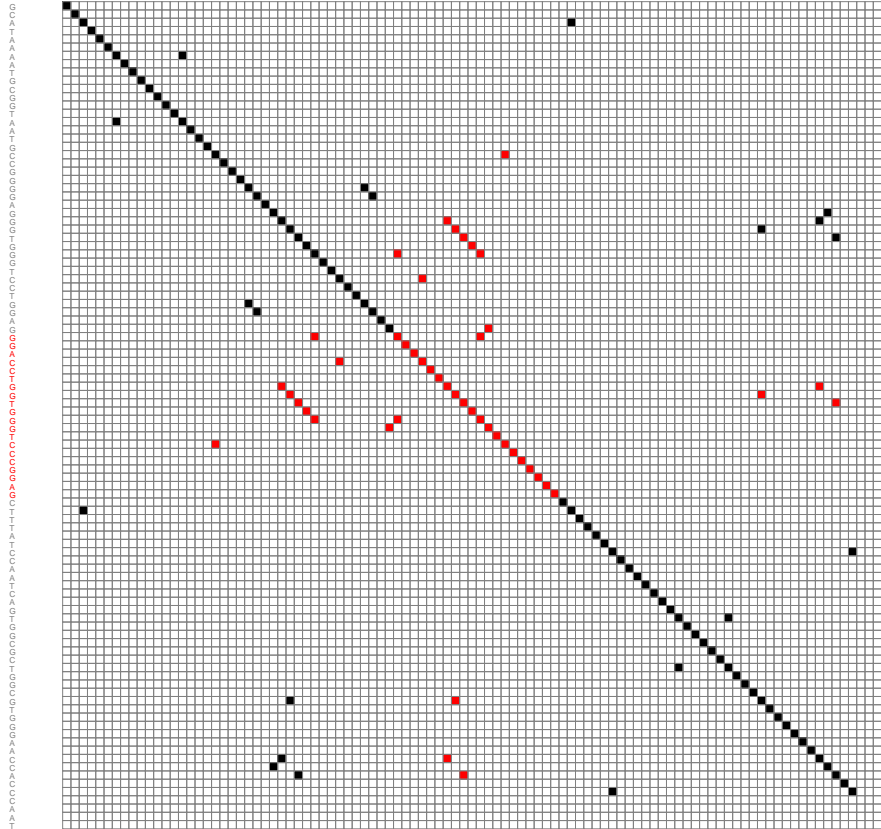

# HP66

CGCTGCTGGCGCTGCTGGCGCTGCCTGGCGCTGCTGCTGCTGCTGGCGGGCGCCAGGG

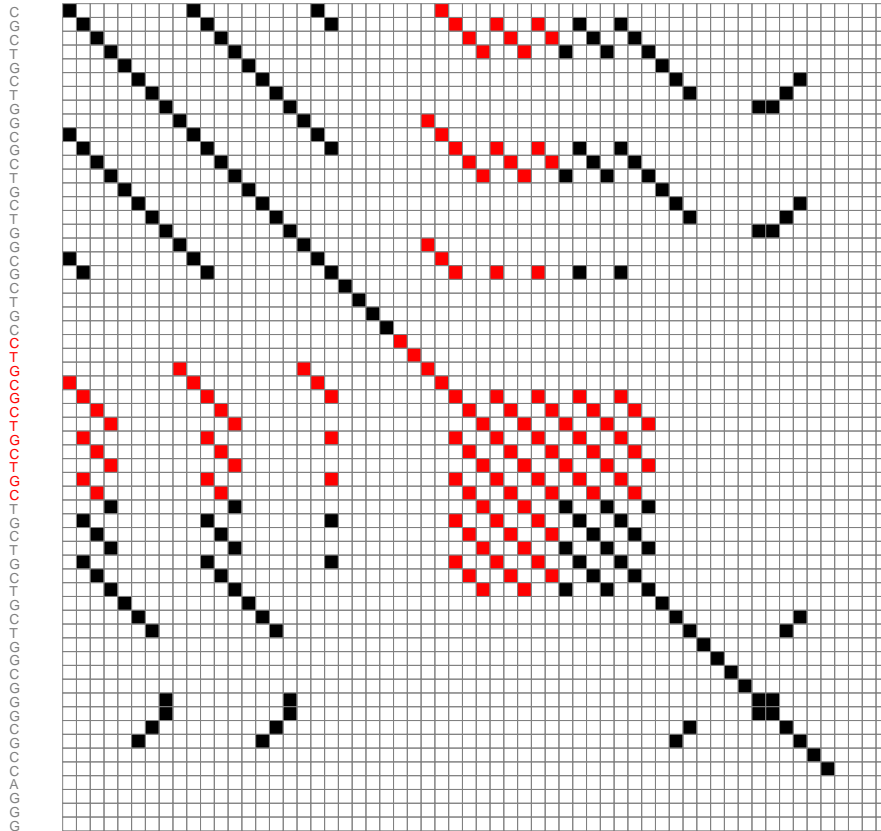



HP68

GGATCCAAACTCAAACTCGTTGAGGTAAAA

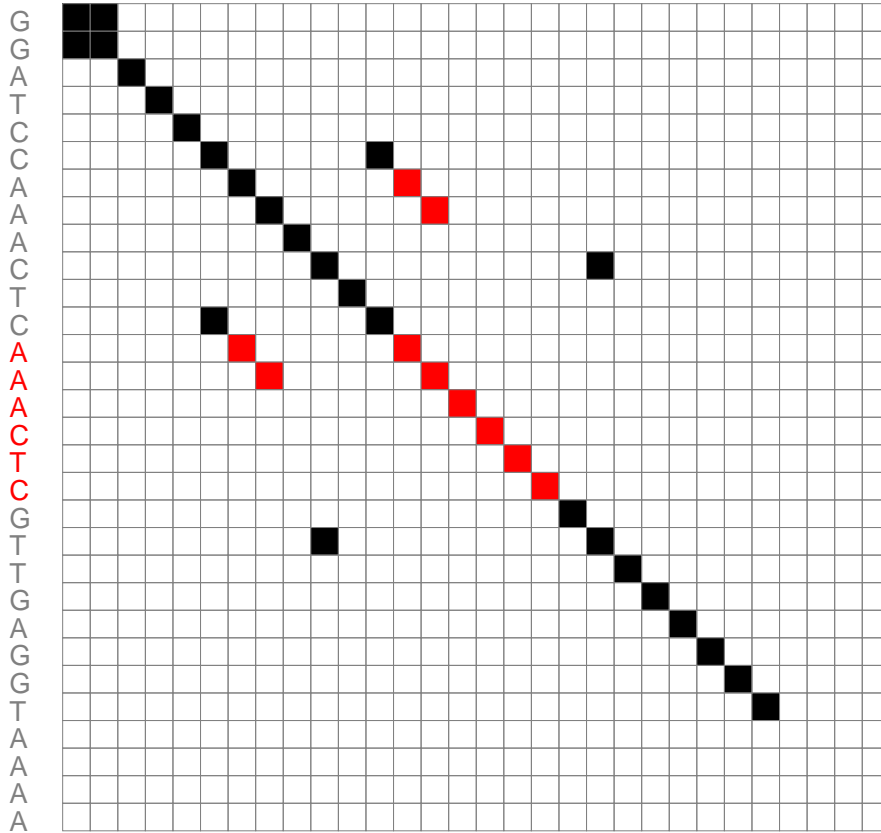



# HP70

TGCAGGCAGCAGGAGCAGAAGGACAGACTTGGCGGGTTGAGAGTAGTGGGATTGGTTGATTGGTTGGGCAAGACTCAGGTACCAAGGAGGAGTTGGG

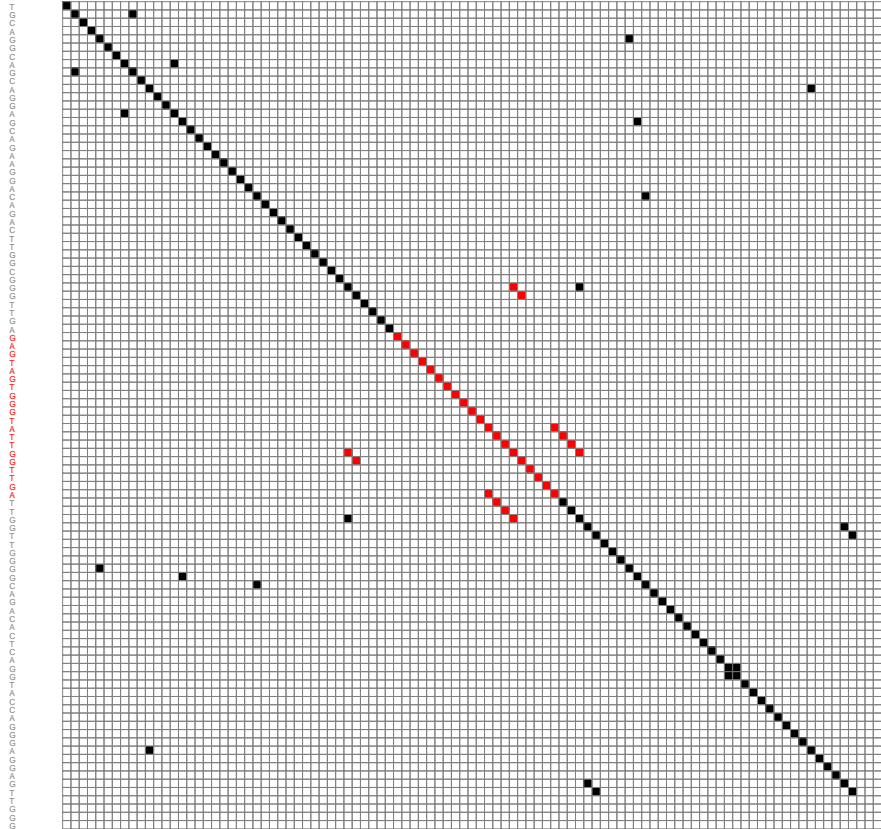



HP72

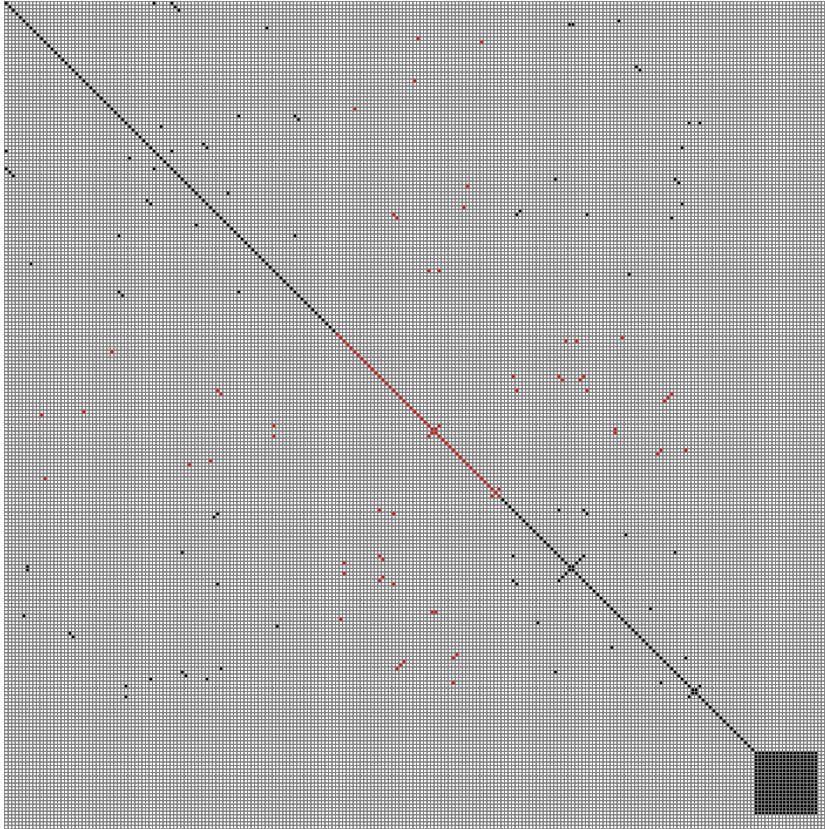



# HP73

AAAGCCAAGATGGCAGGTACGTCTTTTAGAATTTAAGGTTAGTGAAGCCATCTA

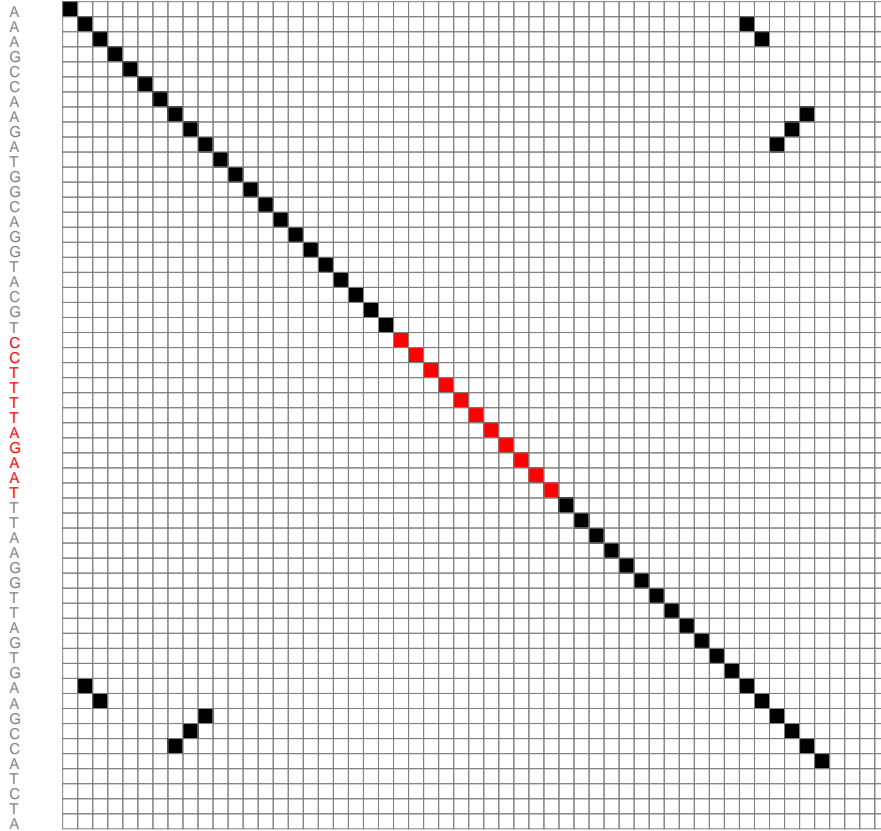

# HP74

CGACATCTCGGC**GTCGGC**TTCTCTGGCGTT

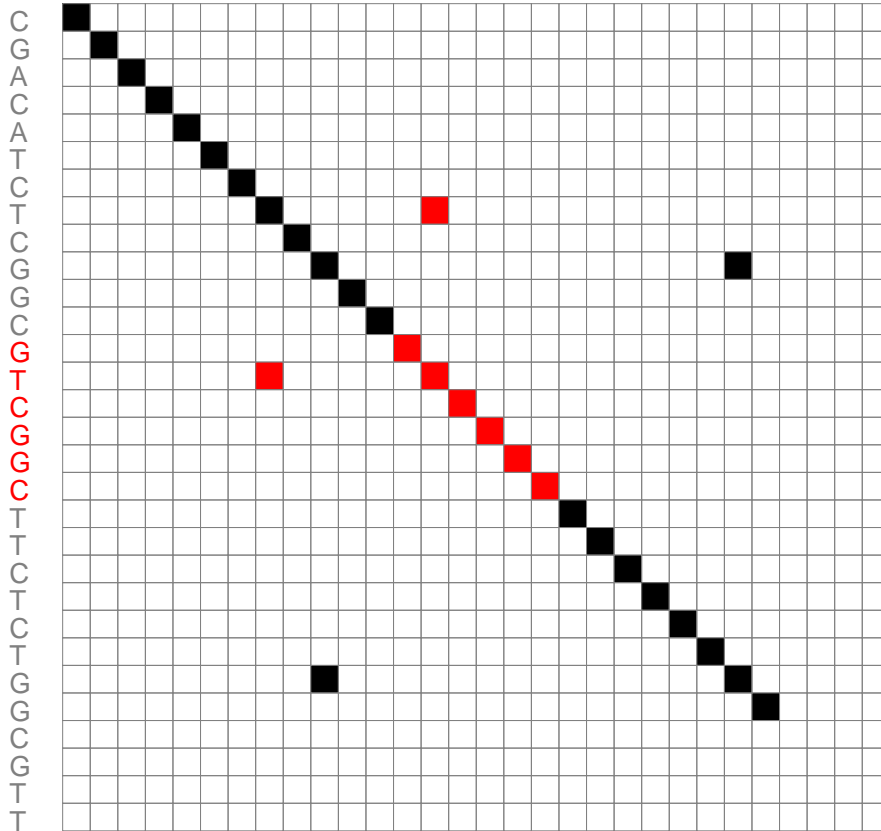

# HP75

G C G G C C C G C C C C A G C C T C T G C C C C C G C C C C

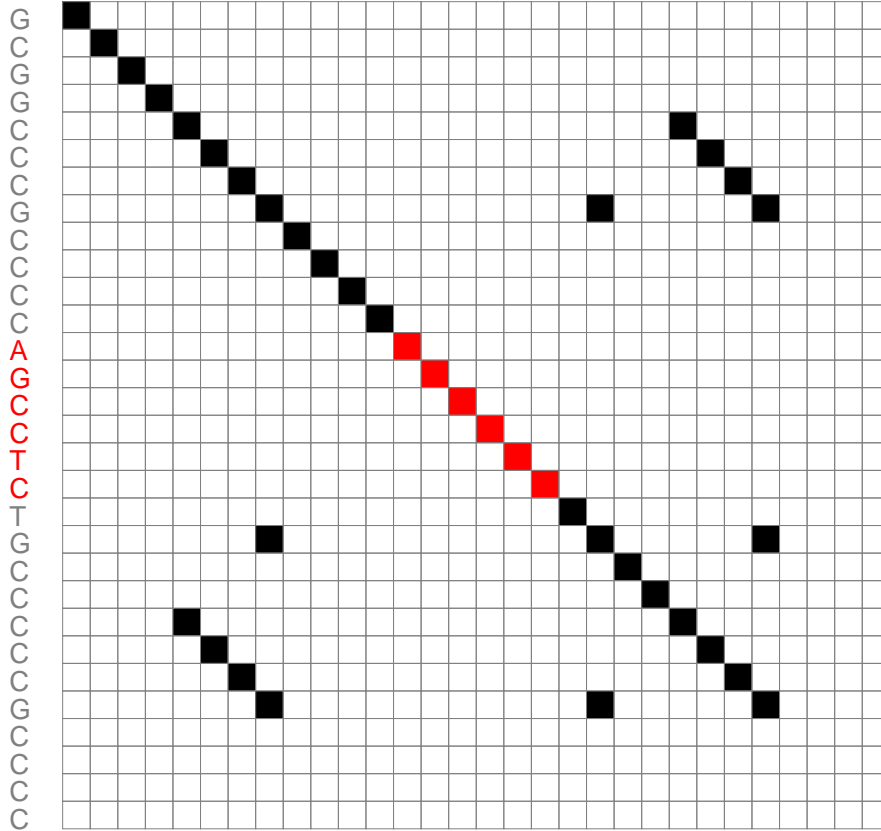





# HP78

CCTCCCGGGAGCGCTGGCACGGCCCCCTTGGCACCAACCCCTCCCCGCGCCCCGCTTCCAGGAA

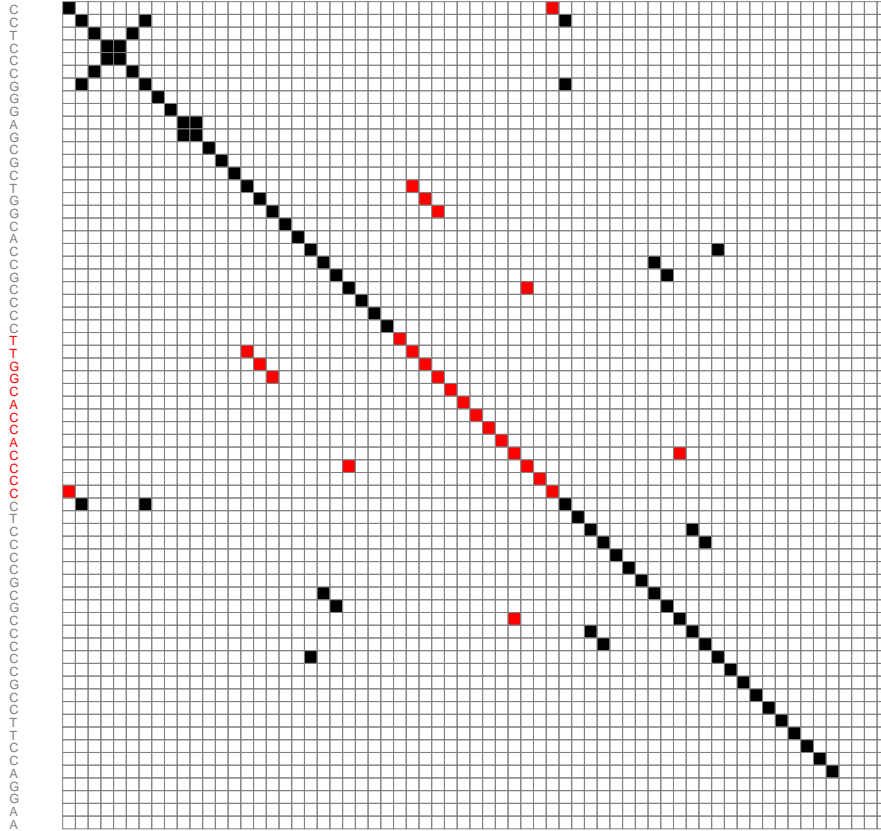



# HP80

GGT GGCTCAGGGCTGGGGCCGGATGCGAGG

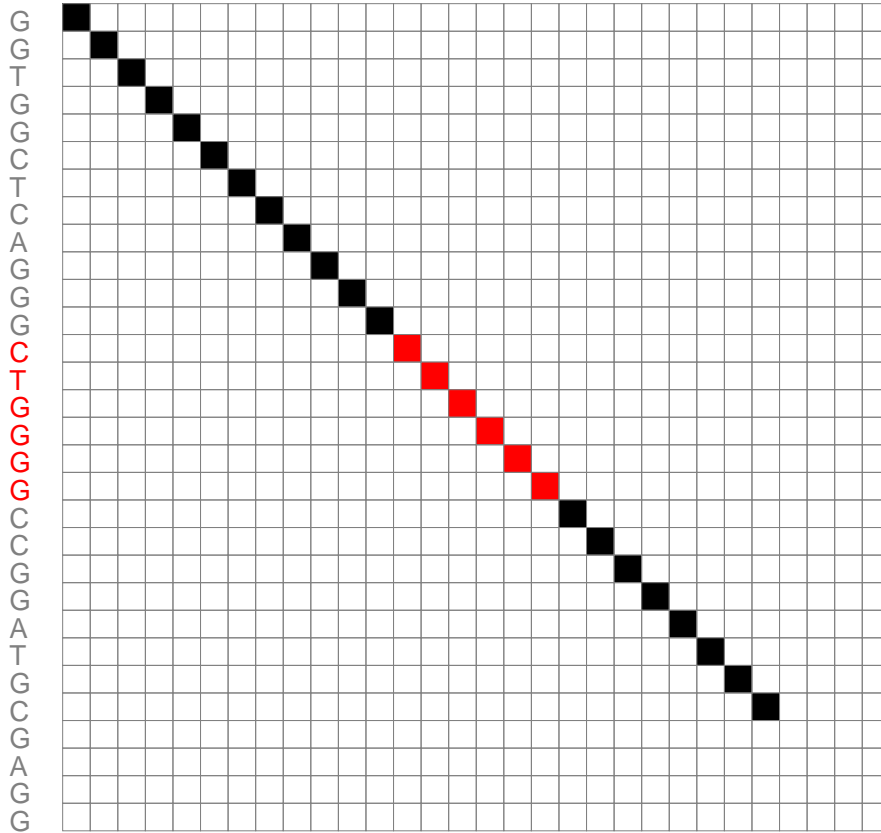



# HP81

TCTGGCCACACAGGGAGCCGAGGCCGAGGCC

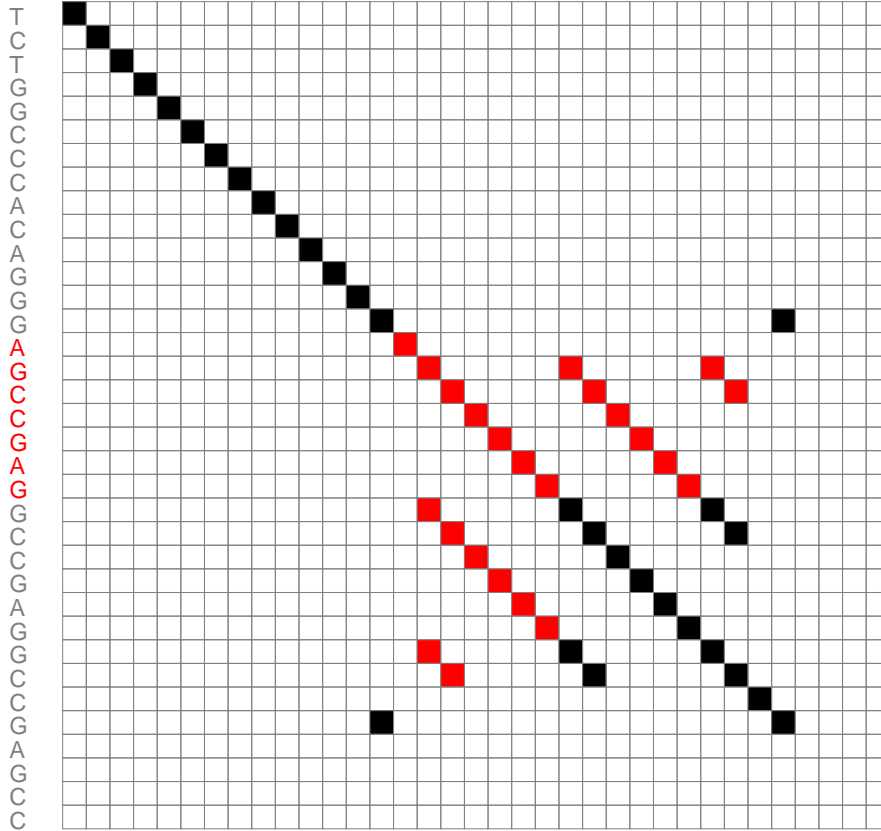

# HP82

CCAGGCAGCGCTGTAAAGAAGTACCTCTAGGCCTGGGAGGCATTGAGAAAAAGGAA

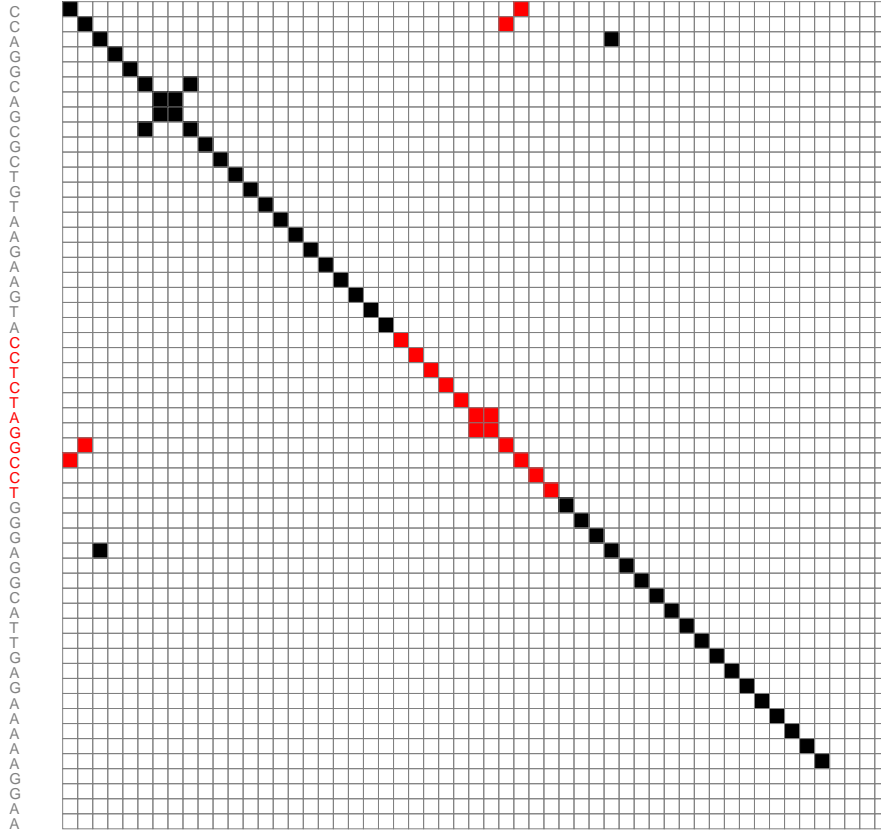

# HP83

AGCTACGACCGAGTACGCTCAGCCGTCCAGCTCGGGCCTTGGAA

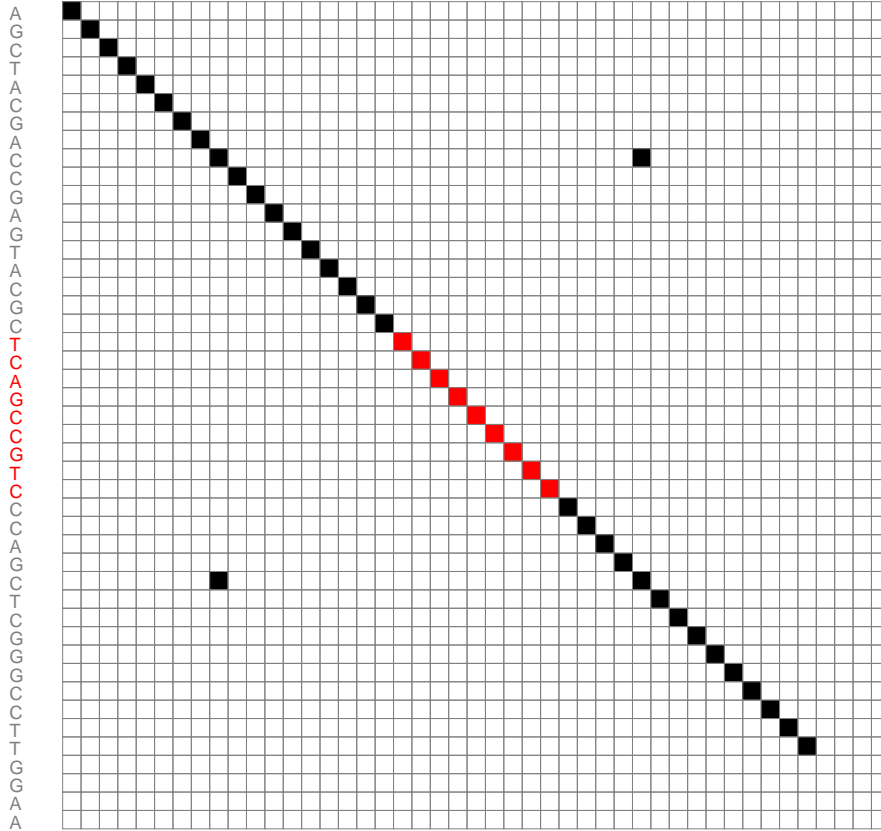

# HP84

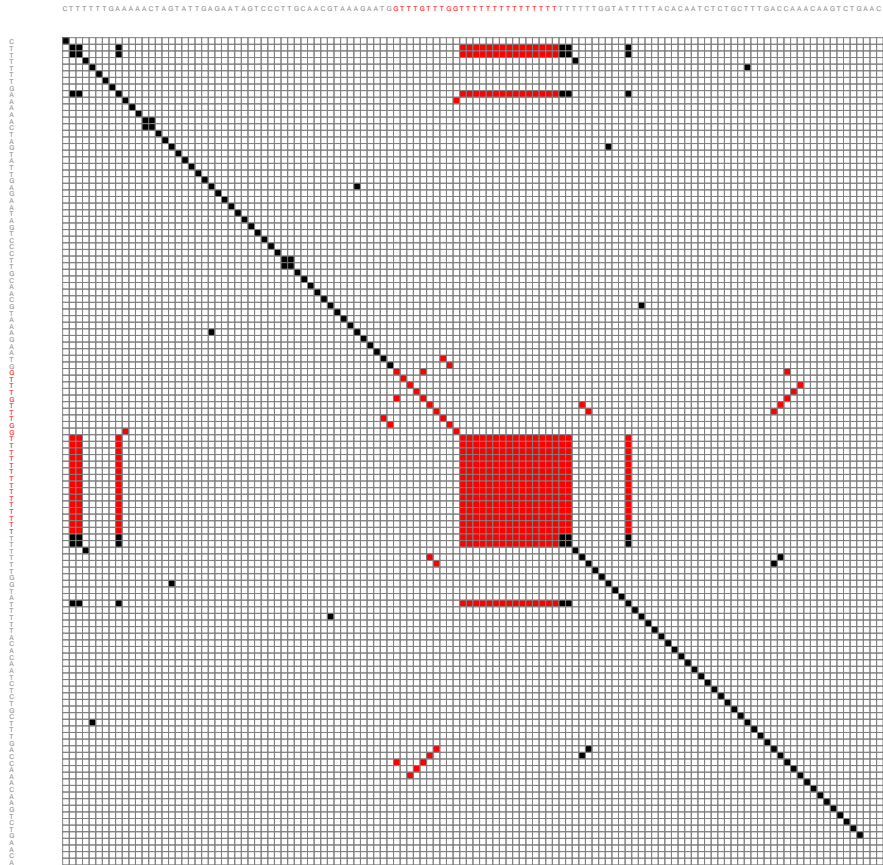

Supplement: 335_2020_9844_MOESM2_ESM.pdf [file 335_2020_9844_MOESM2_ESM.pdf]
