# Supplementary material for: Diversification of CpG-Island Promoters Revealed by Comparative Analysis Between Human and Rhesus Monkey Genomes
Source: PubMed Central journal article supplement (PMC7496026; doi:10.1007/s00335-020-09844-2), 2020-07-09

Supplementary Fig. S1

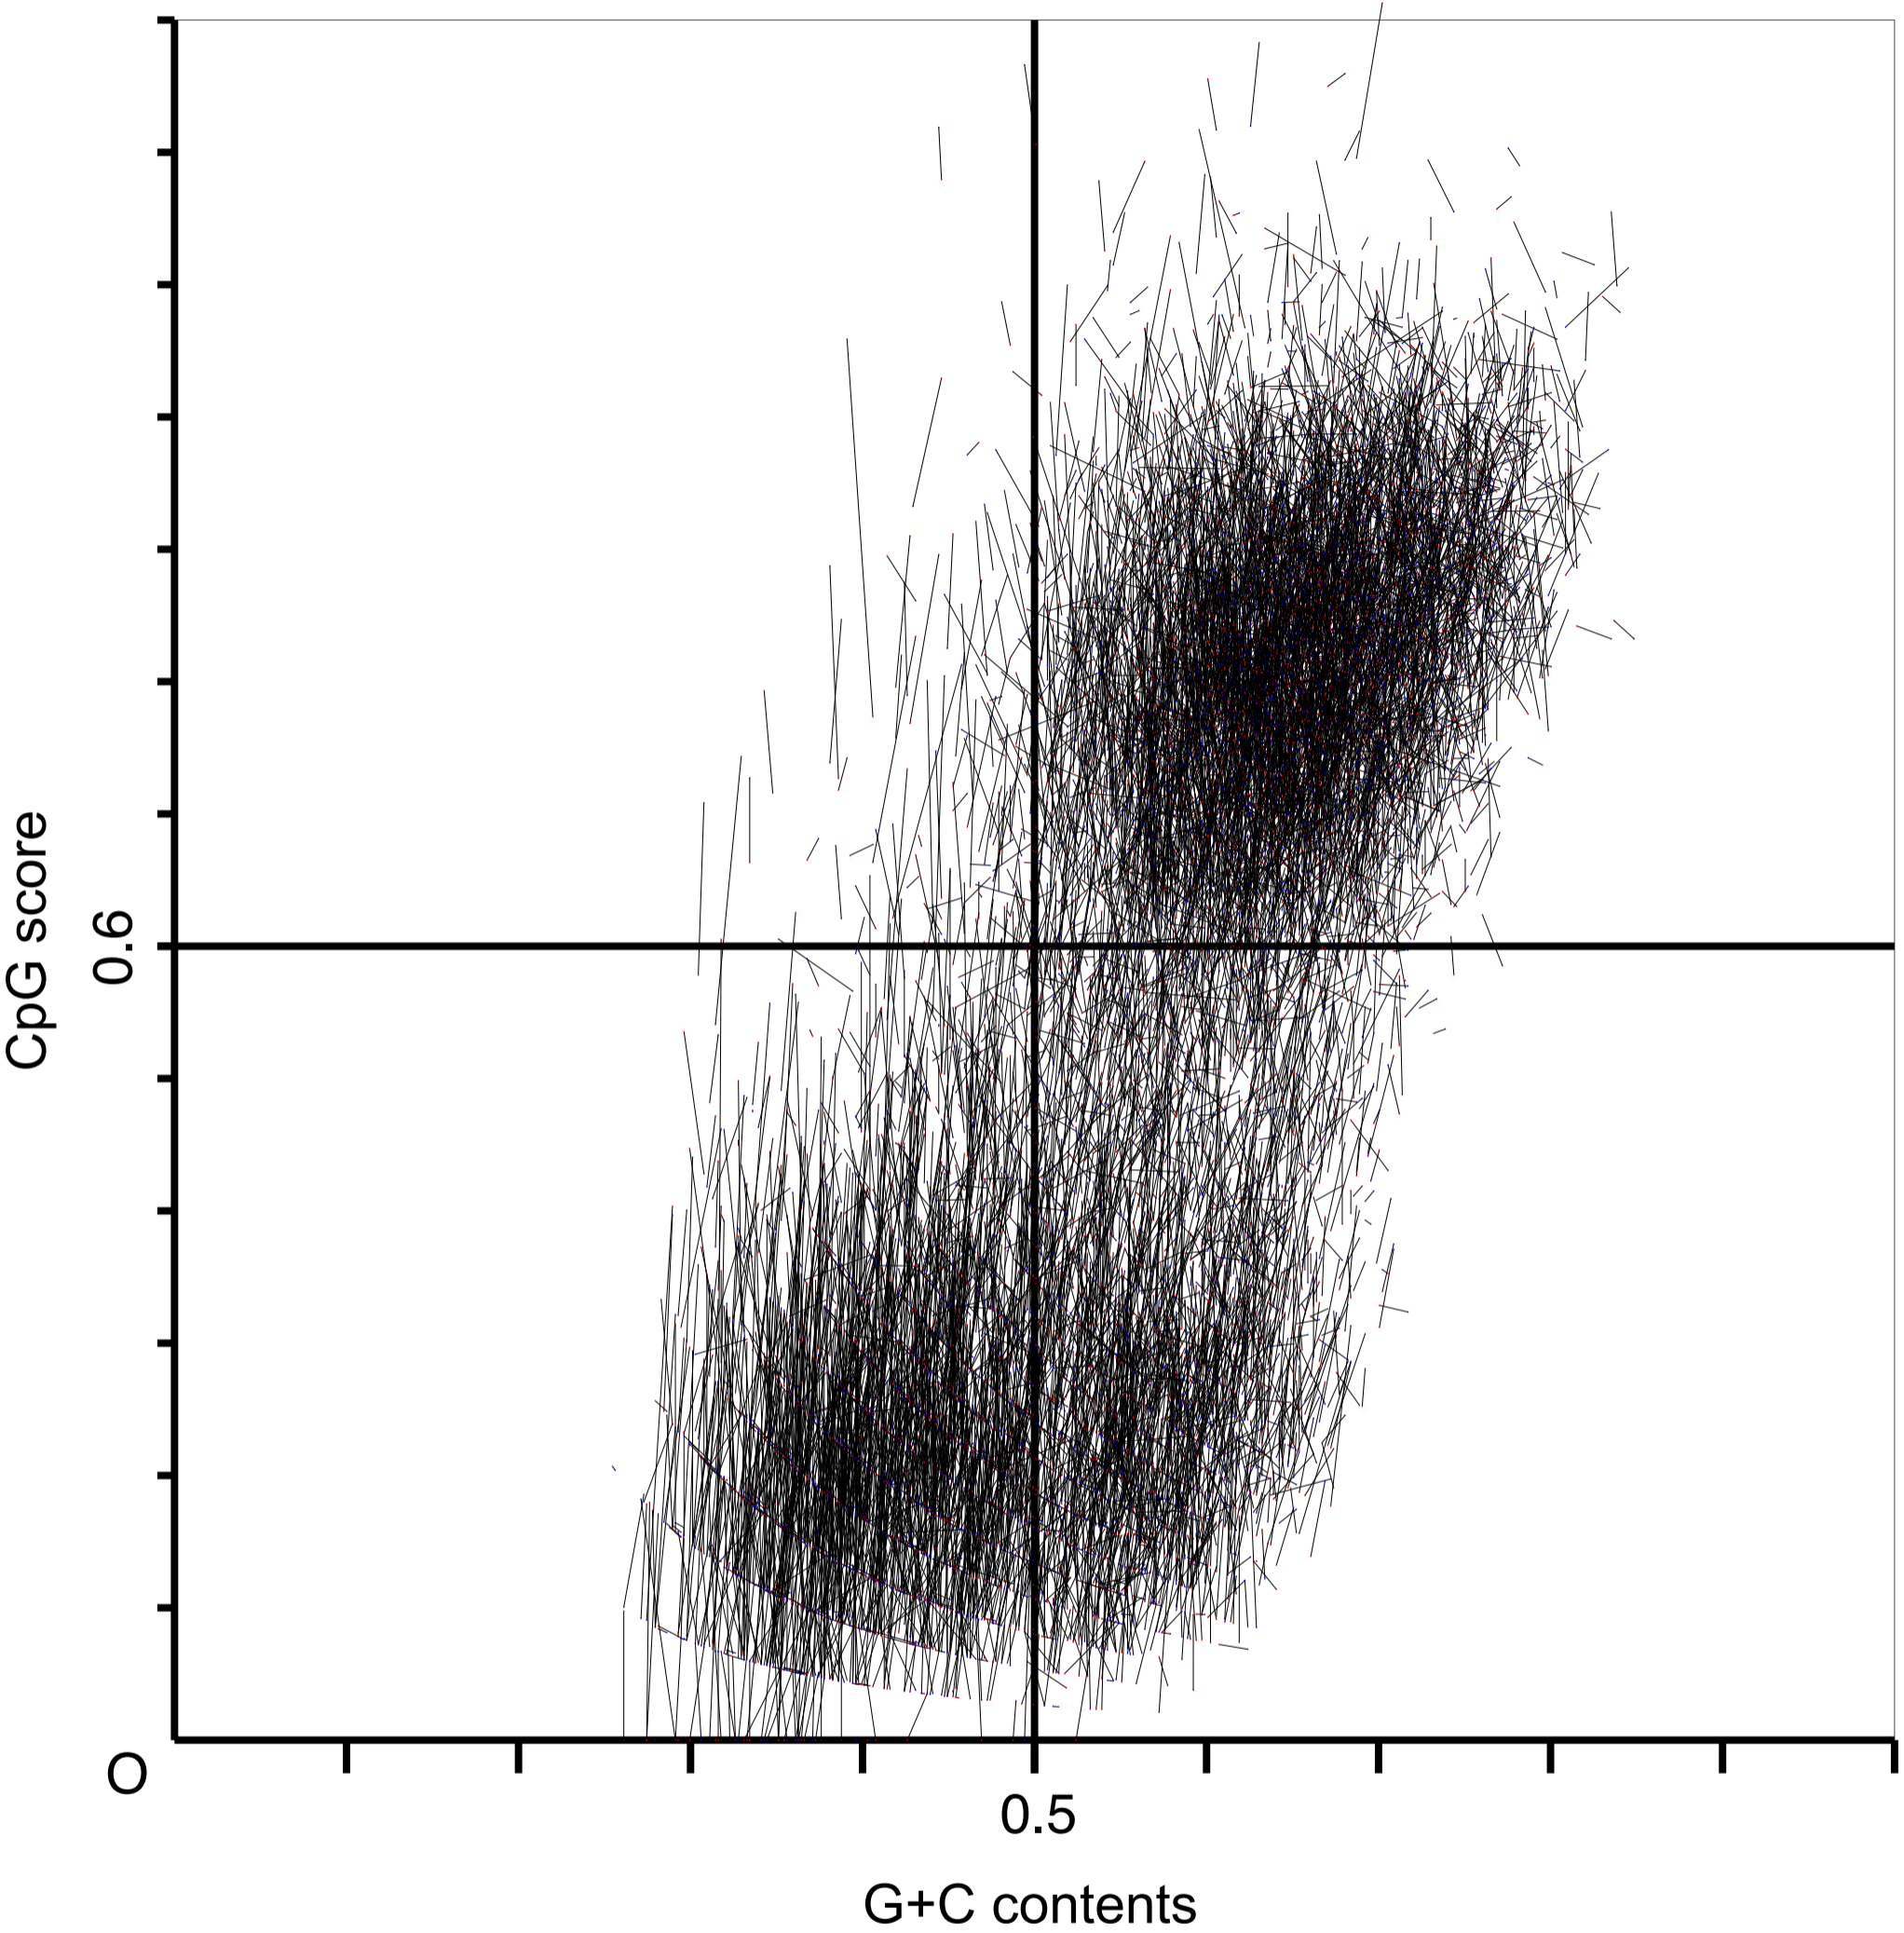

Supplement: 335_2020_9844_MOESM1_ESM.pdf [file 335_2020_9844_MOESM1_ESM.pdf]
