# Supplementary material for: Diversification of CpG-Island Promoters Revealed by Comparative Analysis Between Human and Rhesus Monkey Genomes
Source: PubMed Central journal article supplement (PMC7496026; doi:10.1007/s00335-020-09844-2), 2020-07-09
Supplement: 335_2020_9844_MOESM3_ESM.pdf [file 335_2020_9844_MOESM3_ESM.pdf]

Table S1. List of 88 indels in promoter alignments and their repeat types

| Protein-coding gene                     | Promoter fragment with an indel |                                              |                                              | ID   | Repeat | Repeat type     |
|-----------------------------------------|---------------------------------|----------------------------------------------|----------------------------------------------|------|--------|-----------------|
|                                         | RefSeq ID                       | hg19                                         | rhMac8                                       |      |        |                 |
| NM_053064                               |                                 | GGGCTGGGCTGGGCTGGCCGGGAGC                    | GGGCTGGGCT----GCGCGGAGC                      | HP01 | Yes    | Tandem/Inverted |
| NM_024326                               |                                 | GGGGTAAGAGGTTAGACGGGATGAAGT                  | GGGGTAAGAG-----ATGACCTAGG                    | HP02 | No     | -               |
| NM_014869                               |                                 | GCTGAGCTGGGAGCTGGAGTGAAGGGC                  | GCTGAGCTGG-----AGTGAGGGGC                    | HP03 | Yes    | Tandem          |
| NM_024712                               |                                 | GCGGGAGGGC-----AGGAGGGGCG                    | GCGGGAGGGCGGGTGGACAGGAGGGGCG                 | HP04 | No     | Tandem          |
| NM_014815                               |                                 | CCCTTTGATACTCTTTATTCATTTATT                  | CCCTTTGATA-----TTTATTTATT                    | HP05 | Yes    | Tandem          |
| NM_177424                               |                                 | TCCCAGCTCCAGTCCGACTCCAGTCCCAGC               | TCCCAGCCCC-----AGTCCCAGC                     | HP06 | Yes    | Tandem          |
| NM_001039592,NM_172312                  |                                 | ATCGGGTCGGGTCGGGTCGAGGC                      | ATCGGGTCG-----CGGTGAGAGC                     | HP07 | Yes    | Tandem          |
| NM_014844                               |                                 | TCACGCTGGCTGGCTTACCAGGTT                     | TCAGGCTGCC-----TACCAGGTT                     | HP08 | No     | -               |
| NM_030760                               |                                 | TGGGGGCGCT-----GGGCTGGGCC                    | TGGGGGCGCTTGGGGGCCCTTGGGGCGCGGGGCTGGGCC      | HP09 | Yes    | Tandem          |
| NM_004864                               |                                 | TGTCTCATATCGAGGAAGGATACTGAGGCCA              | TGTCTCAT-----CTGAGGCCA                       | HP10 | Yes    | Tandem/Inverted |
| NM_005869                               |                                 | TGTAATACAATAAACAATAAATCAATTA                 | TGTAATACAA-----ATTACATTA                     | HP11 | Yes    | Tandem          |
| NM_024493                               |                                 | GTTTCAGGAGTATGTTGTGTGTGTGTGT                 | GTTTGCAGGG-----GTGTGTGTGT                    | HP12 | Yes    | Tandem          |
| NM_000971                               |                                 | TCAGGAGGTT-----CTTTGGCTCT                    | TCAGGAGGTTGTTAATTTTGGCTCT                    | HP13 | No     | -               |
| NM_173590                               |                                 | AGCAGGAAGT-----TCAGCAGGGG                    | AGCAGGAAGTGCAGCAGGAAGTTGCAGGAGGG             | HP14 | Yes    | Tandem          |
| NM_006912                               |                                 | AAGTGTGTTA-----TTAAGTGTG                     | AAGTGTGTTAAGTGTGTTTAAAGTGTG                  | HP15 | Yes    | Inverted        |
| NM_003414                               |                                 | ATATACTCTCTTAACTTAATTAGCTA                   | ATGACTCT-----TAATTAGCTA                      | HP16 | Yes    | Tandem/Inverted |
| NM_213607                               |                                 | AAGGGTATGTTCTATGTTAATAGCCTGG                 | AAGGGTATG-----AATGCTGG                       | HP17 | No     | -               |
| NM_025061                               |                                 | AAAGGTGGCGTGAAGTGGCTTGGGAGT                  | AAAGGTGGCC-----CTTGGGAGT                     | HP18 | No     | -               |
| NM_017578                               |                                 | CTGAGGCAGGCGCAGGTTGCGCTGAAGCCAGACCGCGTT      | CTGAGGCCAG-----ACAGCCGTT                     | HP19 | Yes    | Tandem/Inverted |
| NM_001012337                            |                                 | CTGAGGCAGGCGCAGGTTGCGCTGAAGCCAGACCGCGTT      | CTGAGGCCAG-----ACAGCCGTT                     | HP20 | Yes    | Tandem/Inverted |
| NM_018073                               |                                 | GCCAGGAGCT-----GCTCCCTGAC                    | GCCAGGAGCTACTGTCGCCAGCTGCTCCCTGAC            | HP21 | Yes    | Inverted        |
| NM_172059,NM_172060,NM_172058,NM_000503 |                                 | TTTACATAAT-----TTTTTTTTTT                    | TTTACATAAATTTTTTTTTTTTTTTTTT                 | HP22 | Yes    | Tandem          |
|                                         |                                 | AAAAAGAAA-----GCCCCGAGGC                     | AAAAAAAAAAAAAAAAAAGAAAGAAAAAAGAAAAAAGGCC     |      |        |                 |
| NM_172059,NM_172060,NM_172058,NM_000503 |                                 | GTTCCAGGCG-----TTCCCACT                      | GTTCTGGGCTGGCGGGCTTCCCACT                    | HP23 | Yes    | Tandem          |
| NM_199235,NM_024027                     |                                 | AATAAAGAA-----AATTGCTTTT                     | AATAAAGAACATTTCCAGCCCAAAACAATTGCTTTT         | HP24 | Yes    | Inverted        |
| NM_001012665,NM_015522,NM_016008        |                                 | ACAGGAAGAAAAGAAAGTTCCTTA                     | ACAGGAAGA-----AAGTTCCTTA                     | HP25 | Yes    | Inverted        |
| NM_001012665,NM_015522,NM_016008        |                                 | GGGCCGGGGCGGGCGGGCGGGTG                      | GGGCCAGGCC-----GGGCCGGTG                     | HP26 | Yes    | Inverted        |
| NM_001010938,NM_005781                  |                                 | CAGCAGGTC-----AGGCCAATGA                     | CGCCAGGTCCCGGGGCGCAGCCAGCCATGA               | HP27 | Yes    | Tandem          |
| NM_0014364                              |                                 | AATGAGAAAACAAAAACAACAGAAAAA                  | AATGAGAAA-----AACAACAAA                      | HP29 | Yes    | Tandem          |
| NM_007151,NM_001023560,NM_152736        |                                 | GAAGCGGCAGAGGCGTGGCAGCAGGCGTGG               | GAAGCGGCAG-----CAGGCGTGG                     | HP30 | Yes    | Tandem          |
| NM_017549                               |                                 | CAGGTGCTG-----GGCGAGGGT                      | CAGGTGCTGCGGCGGGTGGGGCGAGGTG                 | HP31 | Yes    | Tandem          |
| NM_001003841                            |                                 | CCACCAGCCCTCACCACCGACCCCTCACCACCCACCAAGGGGAC | CCACCAGCC-----AAGGGGACCC                     |      |        |                 |
| NM_016564                               |                                 | CCCCCTCCCC-----GCCCTCTGC                     | CCCCCTCCCCCTCCCCCTCCCCCTCTCTGC               | HP32 | Yes    | Tandem          |
| NM_016564                               |                                 | CTCACTGAGCGGTGGAGCTTGGAGC                    | CTCACTGAGC-----AGCTTGGAGC                    | HP33 | Yes    | Tandem          |
| NM_000334                               |                                 | AGCTTGGAGCCGGCCGGCTCAGAGCGGG                 | AGCTTGGAGC-----TCAGAGGGCG                    | HP34 | Yes    | Tandem          |
| NM_000334                               |                                 | AGGTGGAACAAAAGCTAGCTGGAGCCGGGGCAGTGG         | AGGTGGAACC-----GGGGCAGCGG                    | HP35 | Yes    | Inverted        |
| NM_182833                               |                                 | TAAACTTAACAGTCAAGTCTTTTTT                    | TAAACTTACA-----GTTCTTTTTT                    | HP36 | Yes    | Tandem          |
| NM_007155                               |                                 | CGCCATCG-----CCCTAGAGCC                      | CGCCACCCCTCACCGCCCAAGCCCTAGAACC              | HP37 | Yes    | Inverted        |
| NM_021992                               |                                 | AGGGGAAGGGCGGGTGGGGGGGGGGTGGCGAGCCCG         | AGGGGAAGGG-----GGCGAGCCCG                    | HP38 | Yes    | Tandem          |
| NM_024528                               |                                 | GAAATATATA-----CTTCCCTCA                     | GAAATATATATTCAGTAAATATATCTTCCCTCA            | HP39 | Yes    | Tandem          |
| NM_004270                               |                                 | TATGCCTTAATCAAAAAGAACGAAG                    | TATGCCTTAA-----AGAACGAAG                     | HP40 | Yes    | Tandem          |
| NM_023074                               |                                 | GCCAGTGCC-----GGGGTTAAG                      | GCCCGGTGCAATGCCGGGTTTAAAG                    | HP41 | Yes    | Tandem          |
| NM_021216                               |                                 | CTCGGCTGG-----CTCGGCTGAA                     | CTCTGCTGGGGCAGGGCTCGGCTGAA                   | HP42 | No     | -               |
| NM_003662,NM_001018109                  |                                 | CCGCGCTCC-----GCCTCCTCA                      | CCGCGCTCCCTCCCTCCGCTCCTCCTCA                 | HP43 | Yes    | Tandem          |
| NM_012286                               |                                 | CGGGCTAAAAAAAACCTAAGAGG                      | CGGGCTAAAA-----ACCTAAGAGG                    | HP44 | Yes    | Tandem          |
| NM_004632,NM_033657                     |                                 | GGAGGCGGAG-----AGCGATGAGA                    | GGAGGCGGAGCCGAGAGCAGCAGAGA                   | HP45 | Yes    | Tandem          |
| NM_004995                               |                                 | AACCTAGAGG-----TGTTTTTTTT                    | AACCTAGCGGTGTTTTTTTTTTTTTTT                  | HP46 | No     | -               |
| NM_024900,NM_199320                     |                                 | CGGCGCGGC-----TGCAAGACGA                     | CGGCGCGGGCGGGCTGCAGGACGA                     | HP47 | Yes    | Tandem          |
| NM_002514                               |                                 | CCTGTGTGG-----GCCTGATCGG                     | CCTGTGTGGTGTGTGGCGGTGATCCG                   | HP48 | Yes    | Tandem          |
| NM_022496                               |                                 | GAAGCACAGC-----CCCTAACATT                    | GAAGCACAGCGGACACTCCCTAACATT                  | HP49 | No     | -               |
| NM_016216                               |                                 | AAAAAGAAAAGGAAAAAAGAAAAATA                   | AAAAAGAAAA-----AAGAAAAATA                    | HP50 | Yes    | Tandem          |
| NM_005284                               |                                 | AGGATGTTGGGAGAGGAGGGGAGAAAGATA               | AGGATGTGG-----GAGAAGGATA                     | HP51 | Yes    | Tandem          |
| NM_003174,NM_021738                     |                                 | TCCAGGAAGTTTGGTTTTCTCACAGAGTGTAGCGTCT        | TCCGGGAAG-----GTAGCGTCT                      | HP52 | Yes    | Inverted        |
| NM_018378                               |                                 | GGGGAAGAG-----CTCCCTCC                       | GGGGAAGGAGGGGGAAGAGACTCCCTCC                 | HP53 | Yes    | Tandem          |
| NM_015107                               |                                 | CGAAGAAGT-----GGGGGTTGG                      | -GAAGAAGTCCGGGGTGGGGGTTGGGGGTTGG             | HP54 | Yes    | Tandem          |
| NM_183227,NM_016277                     |                                 | TAGACTCCTC-----CTGCAAGTC                     | TAGACTCCTCTCTCCCTGCAAGTC                     | HP55 | Yes    | Inverted        |
| NM_032606                               |                                 | GAGAGGGAG-----GGGAGAGTGG                     | GAGGAGGAGAGGATAGGAGGAGGAGAGTGG               | HP56 | Yes    | Tandem          |
| NM_005896                               |                                 | AGAAGCGAGGCACTGGAGTCCGGTTGG                  | AGAAGCCGAG-----TCCGGTTGG                     | HP57 | Yes    | Tandem          |
| NM_017638                               |                                 | GGCTCTCTCTCTTTTTTTTTTTTTTTTTTTG              | GGCTCTCTCT-----TTTTTTTTTGA                   | HP58 | Yes    | Tandem          |
| NM_152665                               |                                 | GTCTGCAAGT-----CCGAGGTTCT                    | GTCTGCAAGTCAAGCGGCGGAGGTTCT                  | HP59 | No     | -               |
| NM_152665                               |                                 | CGACGGCTGCGACCCCAAGGAGATAGGGG                | CGAGCGCTC-----AGCACGGGG                      | HP60 | Yes    | Tandem          |
| NM_001042465,NM_001042466,NM_002778     |                                 | TCGCTGGCTTCTCTGGCTTCTCTGGGG                  | TCGCGGCTT-----TCTCTGGGCG                     | HP61 | Yes    | Tandem          |
| NM_005472                               |                                 | CGGTGAGAGGGCCCGTGCAGCGAGCA                   | CGGTGAGAG-----CCAGCGAGCA                     | HP62 | Yes    | Inverted        |
| NM_000270                               |                                 | GGATCGGAGC-----ACACCGGAGC                    | GGATCGGAGCGGATCGGAGCACCGGAGC                 | HP63 | Yes    | Tandem          |
| NM_001256653                            |                                 | GGTCTGGAG-----CTTTATCCAA                     | GGTCTGGAGGACCTGGTGGTCCCGGAGCTTTATCCAA        | HP64 | Yes    | Tandem/Inverted |
| NM_000384                               |                                 | CTGGGCTGCTGCGCTGCTGCTGCTGCTGCT               | CTGGGCTGCT-----TGTCTGCTGCT                   | HP65 | Yes    | Tandem          |
| NM_182496                               |                                 | CGCGGGGTG-----GCGGGTCC                       | CGCGGGTGCAGCACCCTGAGGTTGGGGTGGCC             | HP66 | Yes    | Inverted        |
| NM_182496                               |                                 | ATCAAACCT-----GCTGAGTAA                      | ATCAAACCTCAACTCTGTTGAGTAA                    | HP67 | Yes    | Tandem          |
| NM_022893,NM_018014,NM_138559,NM_138553 |                                 | CGCCCGCCG-----CGCCCGCAG                      | CGCCCGCCGCGCCGCGCCCGCAG                      | HP68 | Yes    | Tandem          |
| NM_000947                               |                                 | GGCGGGTTGG-----TTGTTTGGGG                    | GGCGGGTTGAGAGTGTGGGTTGTTTGGTTGTTTGGGG        | HP69 | Yes    | Tandem          |
| NM_032828                               |                                 | TTGTGGTCCCTCCATGCCCTCAGGTAC                  | TTGTGGGCC-----CTCAGGTAC                      | HP70 | Yes    | Tandem          |
|                                         |                                 | GCCTGCTCG-----TGCGTGGGA                      | GCCTGCTCCGAGCGGCTTGAACACGCCAGAAGTGGGGCCCAAGG | HP71 | Yes    | Tandem          |
| NM_003193                               |                                 | GAATCGTGTGTCTGGGA                            | GAATCGTGTGTCTGGGA                            | HP72 | Yes    | Tandem/Inverted |
| NM_002797                               |                                 | GCAGGTACGCTTTAGAAATTAAGTTAG                  | GCAGGTACGT-----TTAAGTTAG                     | HP73 | No     | -               |
| NM_080737                               |                                 | ACATCGGGC-----TTCTTGGCC                      | ACATCTCGGCTCGGCTTCTCTGGCC                    | HP74 | Yes    | Inverted        |
| NM_022821                               |                                 | GGCAGCCCC-----TGCCCCGC                       | GGCCCGCCCGCAGCTCTGCCCCGC                     | HP75 | Yes    | Tandem          |
| NM_022821                               |                                 | CCAGCCCGGCCAGCCCGCCAGCCCTGC                  | CCAGCCCGC-----CCAGCTCTGC                     | HP76 | Yes    | Tandem          |
| NM_000107                               |                                 | AAAAAAAAAAAAATCATAAAGCCG                     | AAAAATAAA-----CATAAAGCCG                     | HP77 | Yes    | Tandem          |
| NM_000107                               |                                 | GCACGCCCTTGGACCAACCCCTCCCGGCGC               | GCACCGCCC-----CTCCCGGCGC                     | HP78 | Yes    | Tandem          |
| NM_006472                               |                                 | CCTCTCTCTCTCTCTCTCCCTCCCT                    | CCTCTCTCT-----CCCTCCCT                       | HP79 | Yes    | Tandem          |
| NM_016293                               |                                 | TGGCTCAGGCTGGGGCGGATGCGA                     | TGGCTCAGG-----CGGATGCGA                      | HP80 | No     | -               |
| NM_016293                               |                                 | GCCACAGGGAGCCGAGGCGGAGGCCG                   | GCCACAGGA-----GCCAGGGCCG                     | HP81 | Yes    | Tandem          |
| NM_031486,NM_001007101                  |                                 | GTAAGAAGTACCTTAGGCTGGAGGCATT                 | GTAAGAAGTA-----GGGAGGCATT                    | HP82 | Yes    | Inverted        |
| NM_173797                               |                                 | CCAAGTACGC-----CCAGCTCGGG                    | CCGAGTACGCTCAGCGCTCCAGCTCGGG                 | HP83 | Yes    | Inverted        |
| NM_005655,NM_001032282                  |                                 | GTAAGAAGTGGTTGTTGGTTTTTTTTTTTTTTTTTTGGTA     | GTAAGAAGTGGTTGTTGGTTTTTTTTTTTTTTTTTTGGTA     | HP84 | Yes    | Tandem          |
| NM_005655,NM_001032282                  |                                 | CTGACAGT-----TCTTTAAT                        | CTGAACAGTGTTTTTTTTTTTTTAAT                   | HP85 | Yes    | Tandem          |
| NM_016593                               |                                 | AAGAAGCAAG-----GGACGGCAGG                    | AAGAAGCAAGTCCAGGACGGCAAG                     | HP86 | Yes    | Inverted        |
| NM_003576,NM_001032296                  |                                 | GCTTGGAGACCTTTTTGCTTGGTCTTGGAGGGT            | GCTTGGAGG-----CTGAGGGT                       | HP87 | Yes    | Tandem          |
| NM_001252                               |                                 | ATAGGAAGATGTAATGTCTCGCTGAAGGTCGGCGGGGA       | ATAGGAAGAT-----CGGCGGGGA                     | HP88 | Yes    | Inverted        |

Table S2. Alterations of CpG sites in promoters

## CpG sites on human promoter

|              | AA    | AT   | AC   | AG     | TA     | TT    | TC    | TG      | GA    | GT   | GC   | GG     | CA      | CT     | CC     | CG      | Deletion |
|--------------|-------|------|------|--------|--------|-------|-------|---------|-------|------|------|--------|---------|--------|--------|---------|----------|
| hCmC         | 84    | 20   | 42   | 3126   | 178    | 91    | 119   | 6700    | 123   | 56   | 113  | 3425   | 6372    | 3302   | 3381   | 183120  | 3096     |
| hCmN         | 3     | 1    | 1    | 83     | 9      | 4     | 1     | 264     | 1     | 0    | 1    | 81     | 235     | 90     | 88     | 3104    | 56       |
| hNmC         | 0     | 0    | 1    | 26     | 1      | 4     | 2     | 64      | 1     | 0    | 1    | 34     | 56      | 29     | 41     | 1961    | 35       |
| hNmN         | 26    | 2    | 8    | 701    | 137    | 34    | 36    | 4302    | 35    | 18   | 14   | 890    | 4268    | 708    | 821    | 28758   | 618      |
| All promoter | 113   | 23   | 52   | 3936   | 325    | 133   | 158   | 11330   | 160   | 74   | 129  | 4430   | 10931   | 4129   | 4331   | 216943  | 3805     |
| rheMac8.hg38 | 30154 | 7471 | 8307 | 450395 | 104326 | 30802 | 25703 | 2430106 | 25559 | 8252 | 7834 | 388303 | 2435201 | 451675 | 387440 | 6055963 | 210511   |
| rheMac3.hg19 | 28378 | 6921 | 7519 | 427603 | 99112  | 28896 | 23468 | 2329630 | 23671 | 7476 | 6271 | 359599 | 2333117 | 427900 | 359763 | 5393577 | 196609   |

## CpG sites on mocaque promoter

|              | AA    | AT   | AC   | AG     | TA     | TT    | TC    | TG      | GA    | GT   | GC   | GG     | CA      | CT     | CC     | CG      | Deletion |
|--------------|-------|------|------|--------|--------|-------|-------|---------|-------|------|------|--------|---------|--------|--------|---------|----------|
| hCmC_90.list | 76    | 14   | 39   | 2796   | 132    | 83    | 119   | 6080    | 100   | 49   | 110  | 3515   | 5706    | 2944   | 3462   | 183120  | 2546     |
| hCmN_90.list | 0     | 0    | 0    | 38     | 2      | 0     | 0     | 91      | 0     | 1    | 1    | 52     | 109     | 38     | 56     | 3104    | 33       |
| hNmC_90.list | 2     | 1    | 1    | 49     | 3      | 1     | 4     | 127     | 2     | 1    | 1    | 72     | 138     | 41     | 62     | 1961    | 29       |
| hNmN_90.list | 37    | 7    | 13   | 789    | 114    | 36    | 34    | 4384    | 43    | 11   | 11   | 885    | 4199    | 810    | 927    | 28758   | 495      |
| All promoter | 115   | 22   | 53   | 3672   | 251    | 120   | 157   | 10682   | 145   | 62   | 123  | 4524   | 10152   | 3833   | 4507   | 216943  | 3103     |
| rheMac8.hg38 | 24689 | 5689 | 6792 | 348489 | 105158 | 24704 | 24004 | 2309205 | 24174 | 6775 | 7726 | 361893 | 2312550 | 348115 | 362600 | 6055963 | 239848   |
| rheMac3.hg19 | 22861 | 5175 | 6193 | 327098 | 99049  | 22762 | 21998 | 2205678 | 22232 | 6232 | 6285 | 335194 | 2209134 | 326763 | 334749 | 5393577 | 208860   |
